# Supplementary material for: Trends in global shark attacks
Source: PLoS One. 2019 Feb 27;14(2):e0211049. doi: 10.1371/journal.pone.0211049 (PMC6392223; doi:10.1371/journal.pone.0211049)
Supplement: S1 Data — Variables include water area (ocean), continent, country, state, county, and year. (CSV) [file pone.0211049.s001.csv]

water_area	continent	country	state	county	year
Atlantic Ocean	North America	USA	Florida	Indian River County	2015
Atlantic Ocean Islands	Caribbean Islands	Bahama Islands	Abaco Island	DIJ	2015
Indian Ocean	Africa	Republic of South Africa	Eastern Cape	Chintsa	2015
Pacific Ocean	Australia	Australia	New South Wales	Byron Bay	2015
Indian Ocean	Africa	Republic of South Africa	Eastern Cape	East London	2015
Pacific Ocean	Australia	Australia	New South Wales	Ballina	2015
Tasman Sea	Australia	Australia	New South Wales	Newcastle	2015
Tasman Sea	Australia	Australia	New South Wales	Byron Bay	2015
Tasman Sea	Australia	Australia	New South Wales	Ballina	2015
Indian Ocean	Africa	Mascarene Islands	Reunion Island	Saint-Pierre	2015
Pacific Ocean	South America	Ecuador	Galapagos Islands		2015
Pacific Ocean	Pacific Ocean Islands	USA	Hawaii	Hawaii	2015
Red Sea	Africa	Egypt	DIJ	DIJ	2015
Indian Ocean	Africa	Mascarene Islands	Reunion Island	Saint-Paul	2015
Great Australian Bight	Australia	Australia	South Australia	Port Lincoln	2015
Gulf of Mexico	North America	USA	Florida	Collier County	2015
Pacific Ocean	Pacific Ocean Islands	USA	Hawaii	Maui	2015
DIJ	Australia	Australia	New South Wales		2015
Indian Ocean	Africa	Republic of South Africa	Eastern Cape	Port St. Johns	2015
Atlantic Ocean	North America	USA	Florida	Brevard County	2015
Pacific Ocean	Pacific Ocean Islands	New Caledonia	Kouare		2015
Atlantic Ocean	North America	USA	Florida	Volusia County	2015
Atlantic Ocean	North America	USA	South Carolina	Charleston County	2015
Atlantic Ocean	North America	USA	Florida	Volusia County	2015
Atlantic Ocean	North America	USA	Florida	Brevard County	2015
Atlantic Ocean	North America	USA	Florida	Volusia County	2015
Atlantic Ocean	North America	USA	Florida	Brevard County	2015
Indian Ocean	Africa	Mascarene Islands	Reunion Island	Saint-Paul	2015
Atlantic Ocean	North America	USA	Florida	Brevard County	2015
Atlantic Ocean	North America	USA	Florida	Miami-Dade County	2015
Atlantic Ocean	North America	USA	North Carolina	Brunswick County	2015
Atlantic Ocean	North America	USA	North Carolina	Brunswick County	2015
Atlantic Ocean	North America	USA	North Carolina	Brunswick County	2015
Atlantic Ocean	North America	USA	Florida	Volusia County	2015
Gulf of Mexico	North America	USA	Texas	Nueces County	2015
Indian Ocean	Australia	Australia	Western Australia		2015
Atlantic Ocean	North America	USA	North Carolina	Pender County	2015
Atlantic Ocean	North America	USA	North Carolina	Dare County	2015
Atlantic Ocean	North America	USA	South Carolina	Beaufort County	2015
Atlantic Ocean	North America	USA	South Carolina	Beaufort County	2015
Atlantic Ocean	North America	USA	North Carolina	Dare County	2015
Atlantic Ocean	North America	USA	Florida	Duval County	2015
Atlantic Ocean South	Africa	Republic of South Africa	Western Cape	Plettenberg Bay	2015
DIJ	Africa	Republic of South Africa	Western Cape	Knysna	2015
Atlantic Ocean	North America	USA	North Carolina	Hyde County	2015
Atlantic Ocean	North America	USA	South Carolina	Charleston County	2015
Tasman Sea	Australia	Australia	New South Wales	Ballina	2015
Pacific Ocean South	Australia	Australia	New South Wales	Ballina	2015
Atlantic Ocean	North America	USA	North Carolina	Pender County	2015
Pacific Ocean South	Australia	Australia	New South Wales	Yamba	2015
Atlantic Ocean South	Africa	Republic of South Africa	Eastern Cape	Jeffreys Bay	2015
Indian Ocean	Africa	Mascarene Islands	Reunion Island	St. Leu	2015
Atlantic Ocean	North America	USA	Florida	Volusia County	2015
Tasman Sea	Australia	Australia	New South Wales	Evans Head	2015
Atlantic Ocean	North America	USA	South Carolina	Colleton County	2015
DIJ	Australia	Australia	Victoria	Portland	2015
Coral Sea	Australia	Australia	Queensland		2015
Atlantic Ocean	North America	USA	Florida	Duval County	2015
Atlantic Ocean	North America	USA	South Carolina	Georgetown County	2015
DIJ	Australia	Australia	New South Wales	Port Macquarie	2015
Pacific Ocean	North America	USA	California	San Luis Obispo County	2015
Atlantic Ocean	North America	USA	New York	Nassau County	2015
Andaman Sea	Asia	Thailand	Phuket Province	Karon	2015
Atlantic Ocean	North America	USA	South Carolina	Horry County	2015
Gulf of Mexico	North America	USA	Mississippi	Harrison County	2015
Atlantic Ocean	North America	USA	Florida	Duval County	2015
Atlantic Ocean	North America	USA	Florida	Volusia County	2015
Atlantic Ocean	North America	USA	Florida	Nassau County	2015
Atlantic Ocean	North America	USA	Florida	St. Johns County	2015
Nassau Sound- Atlantic Ocean	North America	USA	Florida	Duval County	2015
Coral Sea	Australia	Australia	Queensland	Russell Island	2015
Atlantic Ocean	North America	USA	Florida	St. Johns County	2015
Atlantic Ocean	North America	USA	Florida	Volusia County	2015
Gulf of Mexico	North America	USA	Texas	Galveston County	2015
Atlantic Ocean	North America	USA	Florida	St. Lucie County	2015
Indian Ocean	Australia	Australia	Western Australia	Mandurah	2015
Pacific Ocean	Pacific Ocean Islands	USA	Hawaii	Oahu	2015
Atlantic Ocean	North America	USA	South Carolina	Beaufort County	2015
Pacific Ocean	Pacific Ocean Islands	USA	Hawaii	Oahu	2015
Atlantic Ocean	North America	USA	Florida	Broward County	2015
Atlantic Ocean	North America	USA	Florida	Brevard County	2015
Atlantic Ocean	North America	USA	Florida	Martin County	2015
Atlantic Ocean South	Africa	Republic of South Africa	Western Cape	Still Bay	2015
Pacific Ocean	Pacific Ocean Islands	USA	Hawaii	Oahu	2015
Atlantic Ocean	North America	USA	Florida	Brevard County	2015
Pacific Ocean	Pacific Ocean Islands	USA	Hawaii	Hawaii	2015
Atlantic Ocean	North America	USA	Florida	Brevard County	2015
DIJ	Australia	Australia	New South Wales	Ballina	2015
Pacific Ocean	North America	USA	California	Orange County	2015
Atlantic Ocean	North America	USA	Florida	Palm Beach County	2015
Atlantic Ocean	North America	USA	Florida	Palm Beach County	2015
Atlantic Ocean	North America	USA	Florida	Brevard County	2015
Pacific Ocean	South America	Ecuador	Galapagos Islands	Fernandina Island	2015
Atlantic Ocean	South America	Brazil	Pernambuco	Fernando de Noronha	2015
DIJ	Africa	Republic of South Africa	Eastern Cape	Republic of Transkei	2015
Pacific Ocean	Pacific Ocean Islands	USA	Hawaii	Hawaii	2015
Atlantic Ocean North	Africa	Spain	Canary Islands	Grand Canaria	2015
Atlantic Ocean North	Africa	Spain	Canary Islands	Gran Canaria	2015
Pacific Ocean	Pacific Ocean Islands	USA	Hawaii	Maui	2014
Porpoise Bay	Pacific Ocean Islands	New Zealand	DIJ	Southland	2014
South Pacific Ocean	Pacific Ocean Islands	French Polynesia	Society Islands	Huahine	2014
Atlantic Ocean	North America	USA	Florida	Martin County	2014
Pacific Ocean South	Pacific Ocean Islands	New Caledonia	DIJ	DIJ	2014
Atlantic Ocean	North America	USA	Florida	Palm Beach County	2014
Indian Ocean	Africa	Republic of South Africa	Eastern Cape		2014
Atlantic Ocean	North America	USA	Florida	Palm Beach County	2014
Tasman Sea	Australia	Australia	New South Wales	Tathra	2014
Atlantic Ocean	North America	USA	Florida	Volusia County	2014
Atlantic Ocean	North America	USA	Florida	Volusia County	2014
Atlantic Ocean	North America	USA	Florida	Volusia County	2014
Atlantic Ocean	North America	USA	Florida	Brevard County	2014
Atlantic Ocean	North America	USA	Florida	Volusia County	2014
Atlantic Ocean	North America	USA	South Carolina	Beaufort County	2014
Atlantic Ocean	North America	USA	Georgia	Chatham	2014
Atlantic Ocean	North America	USA	Florida	Duval County	2014
Great Australian Bight	Australia	Australia	South Australia	DIJ	2014
Atlantic Ocean	North America	USA	Florida	Brevard County	2014
Atlantic Ocean	North America	USA	Florida	St. Johns County	2014
Nerang River	Australia	Australia	Queensland	Chevron Island	2014
Intracoastal Waterway	North America	USA	Florida	Broward County	2014
Southern Ocean	Australia	Australia	South Australia	Fleurieu Peninsula	2014
Gulf of Mexico	North America	USA	Texas	Galveston County	2014
Pacific Ocean	Asia	Japan	DIJ	DIJ	2014
Atlantic Ocean	North America	USA	Delaware	Sussex County	2014
Encounter Bay	Australia	Australia	South Australia	DIJ	2014
Atlantic Ocean	North America	USA	Florida	Volusia County	2014
Pacific Ocean	North America	USA	California	San Luis Obispo County	2014
Atlantic Ocean	North America	USA	North Carolina	New Hanover County	2014
Pacific Ocean	North America	USA	California	Monterey County	2014
Bass Strait	Australia	Australia	Victoria	DIJ	2014
Gulf of Mexico	North America	USA	Florida	Okaloosa County	2014
Pacific Ocean	Pacific Ocean Islands	USA	Hawaii	Maui	2014
Atlantic Ocean	North America	USA	North Carolina	Brunswick County	2014
Indian Ocean	Africa	Mascarene Islands	Reunion Island	Saint-Paul	2014
Atlantic Ocean	North America	USA	South Carolina	Charleston County	2014
Atlantic Ocean	Africa	Republic of South Africa	Western Cape	Cape Town	2014
Atlantic Ocean	North America	USA	Florida	Brevard County	2014
Atlantic Ocean	North America	USA	Florida	Brevard County	2014
Atlantic Ocean	North America	USA	South Carolina	Charleston County	2014
Lake Pontchartrain	North America	USA	Louisiana	Orleans Parish	2014
Atlantic Ocean	North America	USA	Florida	Brevard County	2014
Atlantic Ocean	North America	USA	Florida	Broward County	2014
Gulf of Mexico	North America	USA	Florida	Gulf County	2014
Atlantic Ocean	North America	USA	North Carolina	New Hanover County	2014
Atlantic Ocean	North America	USA	South Carolina	Horry County	2014
Atlantic Ocean	North America	USA	North Carolina	New Hanover County	2014
Atlantic Ocean	North America	USA	Florida	Volusia County	2014
Coral Sea	Australia	Australia	New South Wales	Byron Bay	2014
Atlantic Ocean	North America	USA	Florida	Volusia County	2014
Mediterranean Sea	Europe	Spain	DIJ	DIJ	2014
Atlantic Ocean	North America	USA	Florida	Volusia County	2014
Tasman Sea	Australia	Australia	New South Wales	Port Macquarie	2014
Great Australian Bight	Australia	Australia	Western Australia	Esperance	2014
Pacific Ocean	North America	USA	California	Santa Barbara County	2014
Atlantic Ocean North	North America	USA	Florida	Volusia County	2014
Atlantic Ocean	North America	USA	Florida	Volusia County	2014
Atlantic Ocean	North America	USA	Florida	Brevard County	2014
Atlantic Ocean	North America	USA	South Carolina	Beaufort County	2014
Maalaea Bay	Pacific Ocean Islands	USA	Hawaii	Maui	2014
Pacific Ocean	Pacific Ocean Islands	USA	Hawaii	Maui	2014
Pacific Ocean	Pacific Ocean Islands	USA	Hawaii	Maui	2014
Atlantic Ocean	North America	USA	Florida	Brevard County	2014
Keawaeli Bay	Pacific Ocean Islands	USA	Hawaii	Hawaii	2014
Atlantic Ocean	North America	USA	Florida	St. Lucie County	2014
DIJ	Pacific Ocean Islands	USA	Hawaii	Maui	2014
Atlantic Ocean	North America	USA	Florida	Brevard County	2014
Indian Ocean	Australia	Australia	Western Australia	Dawesville	2014
Encounter Bay	Australia	Australia	South Australia	DIJ	2014
Pacific Ocean	North America	USA	California	San Luis Obispo County	2014
Pacific Ocean	South America	Ecuador	Galapagos Islands	Santa Cruz	2014
Pacific Ocean	Pacific Ocean Islands	USA	Hawaii	Hawaii	2013
Atlantic Ocean	North America	USA	Florida	Martin County	2013
DIJ	Caribbean Islands	Jamaica	DIJ		2013
Pacific Ocean	Pacific Ocean Islands	USA	Hawaii	Maui	2013
Tasman Sea	Pacific Ocean Islands	New Zealand	North Island	Auckland	2013
Indian Ocean	Africa	Republic of South Africa	Eastern Cape		2013
Caribbean Sea	Caribbean Islands	Jamaica	DIJ	DIJ	2013
Atlantic Ocean South	Africa	Republic of South Africa	Western Cape	DIJ	2013
Pacific Ocean	Pacific Ocean Islands	USA	Hawaii	Maui	2013
Atlantic Ocean	North America	USA	Florida	Martin County	2013
Atlantic Ocean	North America	USA	Florida	Volusia County	2013
Pacific Ocean	Australia	Australia	Queensland	DIJ	2013
Atlantic Ocean	North America	USA	Florida	Palm Beach County	2013
Atlantic Ocean	North America	USA	Florida	Dade County	2013
Atlantic Ocean	North America	USA	Florida	Brevard County	2013
Indian Ocean	Africa	Mascarene Islands	Reunion Island	Saint-Paul	2013
Atlantic Ocean	North America	USA	Florida	Volusia County	2013
Indian Ocean	Africa	Seychelles	DIJ	DIJ	2013
Indian Ocean	Australia	Australia	Western Australia	DIJ	2013
Atlantic Ocean	North America	USA	South Carolina	Horry County	2013
Atlantic Ocean	North America	USA	Florida	Duval County	2013
Gulf of Mexico	North America	USA	Texas	Brazoria County	2013
Pacific Ocean	Pacific Ocean Islands	USA	Hawaii	Hawaii	2013
Atlantic Ocean North	North America	USA	Florida	Duval County	2013
Atlantic Ocean	North America	USA	South Carolina	Charleston County	2013
Pacific Ocean	Australia	Australia	Victoria	DIJ	2013
Indian Ocean	Africa	Mascarene Islands	Reunion Island	Saint-Paul	2013
Atlantic Ocean	North America	USA	North Carolina	Brunswick County	2013
Atlantic Ocean	North America	USA	Florida	St. Johns County	2013
Atlantic Ocean	North America	USA	South Carolina	Georgetown County	2013
Atlantic Ocean	North America	USA	South Carolina	Horry County	2013
Indian Ocean	Indian Ocean Islands	British Indian Ocean Territory	Diego Garcia	DIJ	2013
Atlantic Ocean	South America	Brazil	Pernambuco	Recife	2013
Pacific Ocean	Pacific Ocean Islands	USA	Hawaii	Oahu	2013
Pacific Ocean	Pacific Ocean Islands	USA	Hawaii	Maui	2013
Atlantic Ocean	North America	USA	South Carolina	Charleston County	2013
Pacific Ocean	Pacific Ocean Islands	USA	Hawaii	Maui	2013
Pacific Ocean	Pacific Ocean Islands	USA	Hawaii	Hawaii	2013
Atlantic Ocean	North America	USA	Florida	Volusia County	2013
Atlantic Ocean	North America	USA	Florida	Volusia County	2013
Atlantic Ocean	North America	USA	Florida	Volusia County	2013
Atlantic Ocean	North America	USA	Florida	Volusia County	2013
Atlantic Ocean Area; creek or river	North America	USA	South Carolina	Beaufort County	2013
Gulf of Mexico	North America	USA	Florida	Escambia County	2013
DIJ	Australia	Australia	New South Wales	DIJ	2013
Atlantic Ocean	North America	USA	Florida	Volusia County	2013
Atlantic Ocean	North America	USA	Florida	Palm Beach County	2013
Gulf of Mexico	North America	USA	Florida	Bay County	2013
Atlantic Ocean	North America	USA	Florida	Brevard County	2013
Gulf of Mexico	North America	USA	Florida	Okaloosa County	2013
Pacific Ocean	North America	USA	California	Humboldt County	2013
DIJ	Australia	Australia	Western Australia	DIJ	2013
Indian Ocean	Africa	Republic of South Africa	Eastern Cape	DIJ	2013
Pacific Ocean	Pacific Ocean Islands	USA	Hawaii	Kauai	2013
Pacific Ocean	Pacific Ocean Islands	USA	Hawaii	Maui	2013
Indian Ocean	Africa	Mascarene Islands	Reunion Island	Saint-Pierre	2013
Indian Ocean	Australia	Australia	Western Australia	DIJ	2013
Pacific Ocean Islands	Pacific Ocean Islands	USA	Hawaii	Maui	2013
Atlantic Ocean	North America	USA	Florida	Dade County	2013
Indian Ocean	Australia	Australia	Western Australia	DIJ	2013
Pacific Ocean	Pacific Ocean Islands	USA	Hawaii	Maui	2013
Tasman Sea	Australia	Australia	New South Wales	DIJ	2013
Pacific Ocean	Australia	Australia	New South Wales	DIJ	2013
Atlantic Ocean	North America	USA	Florida	Volusia County	2013
Atlantic Ocean	North America	USA	Florida	Brevard County	2013
Pacific Ocean	North America	USA	Oregon	Lincoln	2013
Pacific Ocean	Pacific Ocean Islands	USA	Hawaii	Hawaii	2013
Atlantic Ocean South	Africa	Republic of South Africa	Western Cape	DIJ	2013
Pacific Ocean	Australia	Australia	Queensland	DIJ	2013
Pacific Ocean	Pacific Ocean Islands	New Caledonia	North Province	DIJ	2013
Gulf of Mexico	North America	USA	Alabama	Baldwin	2013
Atlantic Ocean South	Africa	Republic of South Africa	Eastern Cape		2013
Pacific Ocean	Polynesian Islands	French Polynesia	Tuamotu Islands	Fakarava Atoll	2013
Indian Ocean	Africa	Mascarene Islands	Reunion Island	Saint-Pierre	2013
Indian Ocean	Africa	Mascarene Islands	Reunion Island	Saint-Pierre	2013
Tortuga Bay	South America	Ecuador	Galapagos Islands	Santa Cruz	2013
Pacific Ocean South	Australia	Australia	New South Wales	DIJ	2012
Pacific Ocean North	North America	USA	Oregon	Lincon County	2012
Indian Ocean	Africa	Republic of South Africa	Eastern Cape	DIJ	2012
Pacific Ocean South	Australia	Australia	New South Wales	Newcastle	2012
Indian Ocean	Australia	Australia	Western Australia	DIJ	2012
Coral Sea	Australia	Australia	Queensland	DIJ	2012
Manning River	Australia	Australia	New South Wales	DIJ	2012
Indian Ocean Islands	Africa	Mascarene Islands	Reunion Island	Saint-Benoit	2012
Atlantic Ocean	North America	USA	Florida	Palm Beach County	2012
Atlantic Ocean	North America	USA	Florida	Brevard County	2012
Red Sea	Asia	Saudi Arabia	Tabuk	DIJ	2012
Pacific Ocean	Pacific Ocean Islands	New Zealand	North Island	Taranaki	2012
Atlantic Ocean	North America	USA	Florida	Volusia County	2012
Atlantic Ocean	North America	USA	Florida	Volusia County	2012
Atlantic Ocean	North America	USA	Florida	Martin County	2012
DIJ	Australia	Australia	Western Australia	DIJ	2012
Pacific Ocean Islands	Pacific Ocean Islands	USA	Hawaii	Oahu	2012
Pacific Ocean Islands	Pacific Ocean Islands	USA	Hawaii	Lanai	2012
DIJ	North America	USA	Georgia	Glynn	2012
Atlantic Ocean South	Africa	Republic of South Africa	Western Cape		2012
Atlantic Ocean	North America	USA	Florida	Brevard County	2012
Pacific Ocean North	North America	USA	California	Los Angeles County	2012
Atlantic Ocean	North America	USA	Florida	Indian River County	2012
Atlantic Ocean North	North America	USA	Florida	Duval County	2012
Atlantic Ocean	North America	USA	North Carolina	Dare County	2012
Atlantic Ocean	North America	USA	South Carolina	Horry County	2012
DIJ	Australia	Australia	Victoria	DIJ	2012
Atlantic Ocean	North America	USA	South Carolina	Horry County	2012
Atlantic Ocean	North America	USA	South Carolina	Horry County	2012
Atlantic Ocean	North America	USA	South Carolina	Horry County	2012
Atlantic Ocean	North America	USA	South Carolina	Horry County	2012
Atlantic Ocean	North America	USA	North Carolina	Brunswick County	2012
Pacific Ocean	Pacific Ocean Islands	USA	Hawaii	Maui	2012
Atlantic Ocean	North America	USA	Florida	Volusia County	2012
Atlantic Ocean	North America	USA	Florida	Palm Beach County	2012
Atlantic Ocean	North America	USA	Florida	Martin County	2012
Indian Ocean	Africa	Republic of South Africa	Western Cape		2012
Indian Ocean	Australia	Australia	Western Australia	DIJ	2012
Indian Ocean	Africa	Mascarene Islands	Reunion Island	Saint-Paul	2012
Atlantic Ocean	North America	Puerto Rico		DIJ	2012
Lombok Straits	Asia	Indonesia	DIJ		2012
Atlantic Ocean	North America	USA	Massachusetts	Barnstable	2012
DIJ	Australia	Australia	South Australia	DIJ	2012
Pacific Ocean	Pacific Ocean Islands	USA	Hawaii	Kauai	2012
Indian Ocean	Africa	Mascarene Islands	Reunion Island	Saint-Paul	2012
DIJ	Australia	Australia	Western Australia	DIJ	2012
Atlantic Ocean	North America	USA	Florida	Volusia County	2012
Atlantic Ocean	North America	USA	Florida	Volusia County	2012
Atlantic Ocean	North America	USA	Florida	Brevard County	2012
Atlantic Ocean	North America	USA	Florida	St. Johns County	2012
Atlantic Ocean	North America	USA	Florida	Miami-Dade	2012
Atlantic Ocean	North America	USA	New York	Suffolk	2012
Pacific Ocean South	Pacific Ocean Islands	Tonga	Tonga Islands	DIJ	2012
Atlantic Ocean	North America	USA	Florida	Brevard County	2012
Atlantic Ocean	North America	USA	Florida	Brevard County	2012
Atlantic Ocean	North America	USA	Florida	Brevard County	2012
Pacific Ocean North	North America	USA	California	Santa Cruz County	2012
Niger Delta	Africa	Nigeria		DIJ	2012
	Africa	Spain	Canary Islands	Las Palmas	2012
Atlantic Ocean	North America	USA	Florida	Martin County	2012
Pacific Ocean	Pacific Ocean Islands	USA	Hawaii	Maui	2012
Atlantic Ocean	North America	USA	Florida	Brevard County	2012
Atlantic Ocean	North America	USA	Florida	Volusia County	2012
Indian Ocean	Australia	Australia	Western Australia	DIJ	2012
Pacific Ocean North	North America	USA	California	Santa Barbara County	2012
Pacific Ocean	Pacific Ocean Islands	USA	Hawaii	Maui	2012
Pacific Ocean	North America	USA	California	Humboldt County	2012
Pacific Ocean	Pacific Ocean Islands	USA	Hawaii	Maui	2012
Pacific Ocean	Pacific Ocean Islands	USA	Hawaii	Kauai	2012
Atlantic Ocean	North America	USA	Florida	Brevard County	2012
Pacific Ocean	Pacific Ocean Islands	USA	Hawaii	Maui	2012
Pacific Ocean	Pacific Ocean Islands	USA	Hawaii	Kauai	2012
Atlantic Ocean	North America	USA	Florida	Duval County	2012
Atlantic Ocean	North America	USA	Florida	Duval County	2012
Indian Ocean	Africa	Republic of South Africa	Eastern Cape	Eastern Cape	2012
Tasman Sea	Australia	Australia	New South Wales	DIJ	2012
DIJ	Australia	Australia	New South Wales	DIJ	2012
Atlantic Ocean	North America	USA	Florida	Martin County	2012
Pacific Ocean	Australia	Australia	Tasmania	DIJ	2012
Pacific Ocean	North America	USA	California	Los Angeles County	2012
Atlantic Ocean	North America	USA	Florida	Volusia County	2012
Indian Ocean	Africa	Mascarene Islands	Reunion Island	Saint-Paul	2012
Pacific Ocean	South America	Ecuador	Galapagos Islands	Santa Cruz	2012
Indian Ocean	Africa	Republic of South Africa	Eastern Cape	Transkei District	2011
Atlantic Ocean	Open Ocean	Cuba/Mexico	Open Ocean/Sea	DIJ	2011
Pacific Ocean Area; creek or river	Australia	Australia	New South Wales	DIJ	2011
Atlantic Ocean	North America	Mexico	Quintana Roo Territory	DIJ	2011
Indian Ocean	Australia	Australia	Western Australia	DIJ	2011
Southern Ocean	Australia	Australia	South Australia	DIJ	2011
Indian Ocean Islands	Africa	Mascarene Islands	Reunion Island	Saint-Paul	2011
Tasman Sea	Australia	Australia	New South Wales	DIJ	2011
Caribbean Sea	North America	Mexico	Quintana Roo Territory	DIJ	2011
Pacific Ocean	Australia	Australia	New South Wales	DIJ	2011
Atlantic Ocean	North America	USA	Florida	Brevard County	2011
Pacific Ocean	Pacific Ocean Islands	New Zealand	South Island	Westland	2011
Atlantic Ocean	North America	Mexico	Quintana Roo Territory	DIJ	2011
Indian Ocean	Asia	Indonesia	Bali	DIJ	2011
Atlantic Ocean	North America	USA	Florida	Volusia County	2011
Indian Ocean	Asia	Indonesia	Bali	DIJ	2011
Atlantic Ocean	North America	USA	Florida	Volusia County	2011
Atlantic Ocean	North America	USA	Florida	St. Johns County	2011
Pacific Ocean	Pacific Ocean Islands	USA	Hawaii	Hawaii	2011
Pacific Ocean	Pacific Ocean Islands	New Caledonia	DIJ	DIJ	2011
Pacific Ocean	Pacific Ocean Islands	USA	Hawaii	Hawaii	2011
Atlantic Ocean	North America	USA	Texas	Brazoria County	2011
Atlantic Ocean	Africa	Republic of South Africa	Western Cape	DIJ	2011
Atlantic Ocean	North America	USA	Florida	Volusia County	2011
Atlantic Ocean	North America	USA	Florida	Palm Beach County	2011
Indian Ocean	Africa	Mascarene Islands	Reunion Island	Saint-Paul	2011
Pacific Ocean	Central America	Costa Rica	Guanacaste	DIJ	2011
Gulf of Mexico	North America	USA	Alabama	Baldwin County	2011
Atlantic Ocean	South America	Brazil	Pernambuco	Recife	2011
Atlantic Ocean	North America	USA	North Carolina	Onslow County	2011
Caribbean Sea	South America	Colombia	DIJ	DIJ	2011
Indian Ocean	Africa	Mascarene Islands	Reunion Island	Saint-Paul	2011
Gulf of Mexico	North America	USA	Texas	Calhoun County	2011
Atlantic Ocean	North America	USA	North Carolina	Hyde County	2011
Indian Ocean	Africa	Republic of South Africa	Eastern Cape	DIJ	2011
Indian Ocean	Africa	Seychelles	Praslin	DIJ	2011
Pacific Ocean	North America	USA	California	San Diego County	2011
Atlantic Ocean	Open Ocean	USA	Open Ocean/Sea	DIJ	2011
Atlantic Ocean	North America	USA	South Carolina	Horry County	2011
Pacific Ocean	Pacific Ocean Islands	French Polynesia	Tahiti	DIJ	2011
Caribbean Sea	Caribbean Islands	Puerto Rico	Vieques	DIJ	2011
Sea of Japan	Asia	Russia	Khasansky	Primorye	2011
Indian Ocean	Africa	Seychelles	Praslin Island	DIJ	2011
Atlantic Ocean	North America	USA	North Carolina	New Hanover County	2011
DIJ	Asia	Russia	Khasansky (Khasan District)	Primorye	2011
Atlantic Ocean	Africa	Republic of South Africa	Western Cape	DIJ	2011
Atlantic Ocean	North America	USA	North Carolina	Brunswick county	2011
DIJ	Asia	Russia	Khasan	Primorye	2011
Pacific Ocean	Australia	Australia	Queensland	DIJ	2011
Atlantic Ocean	North America	USA	Florida	St. Johns County	2011
Caribbean Sea	Caribbean Islands	Turks and Caicos Islands	Turks and Caicos Islands	Middle Caicos	2011
Atlantic Ocean	North America	USA	Florida	Volusia County	2011
Indian Ocean	Australia	Australia	Western Australia	DIJ	2011
Pacific Ocean	Pacific Ocean Islands	USA	Hawaii	Oahu	2011
Pacific Ocean	Pacific Ocean Islands	Papua New Guinea	DIJ	DIJ	2011
Pacific Ocean	North America	USA	California	Humboldt County	2011
Atlantic Ocean	North America	USA	Florida	Volusia County	2011
Indian Ocean	Africa	Kenya	DIJ	DIJ	2011
Indian Ocean	Africa	Mascarene Islands	Reunion Island	Saint-Paul	2011
Atlantic Ocean	North America	USA	South Carolina	Horry County	2011
False Bay	Africa	Republic of South Africa	Western Cape	DIJ	2011
Gulf of Mexico	North America	USA	Alabama	Baldwin County	2011
Caribbean Sea	North America	Mexico	Quintana Roo Territory	DIJ	2011
Pacific Ocean	Australia	Australia	Victoria	DIJ	2011
Pacific Ocean	North America	USA	Oregon	DIJ	2011
Indian Ocean	Australia	Australia	Western Australia	DIJ	2011
Atlantic Ocean	North America	USA	Florida	Brevard County	2011
Pacific Ocean	North America	USA	California	Monterey County	2011
Atlantic Ocean	South America	Brazil	Pernambuco	Olinda	2011
Indian Ocean Area; creek or river	Asia	Indonesia	Bali	DIJ	2011
Pacific Ocean	Australia	Australia	New South Wales	DIJ	2011
Pacific Ocean	North America	USA	Oregon	Clatsop County	2011
Pacific Ocean	Australia	Australia	New South Wales	DIJ	2011
Tasman Sea	Australia	Australia	New South Wales	DIJ	2011
Atlantic Ocean	Caribbean Islands	Antigua	DIJ	DIJ	2011
Atlantic Ocean	North America	USA	Florida	Volusia County	2011
Pacific Ocean	South America	Ecuador	Santa Elena	DIJ	2011
Coral Sea	Australia	Australia	Queensland	DIJ	2011
DIJ	Open Ocean	USA	Open Ocean/Sea	DIJ	2011
Pacific Ocean	Australia	Australia	Queensland	DIJ	2010
Pacific Ocean	Asia	Vietnam	Binh Dinh	DIJ	2010
South China Sea	Asia	Vietnam	Binh Dahn	DIJ	2010
South China Sea	Asia	Vietnam	Binh Dinh	DIJ	2010
Pacific Ocean	Africa	Republic of South Africa	Western Cape	DIJ	2010
Indian Ocean	Africa	Republic of South Africa	Eastern cape	DIJ	2010
Pacific Ocean	Australia	Australia	Victoria	DIJ	2010
Indian Ocean	Asia	United Arab Emerits	Dubai	DIJ	2010
Atlantic Ocean	North America	USA	Florida	Martin County	2010
Pacific Ocean	Australia	Australia	New South Wales	DIJ	2010
Pacific Ocean	Australia	Australia	New South Wales	DIJ	2010
Pacific Ocean	Australia	Australia	Queensland	DIJ	2010
Pacific Ocean	Australia	Australia	Queensland	DIJ	2010
Atlantic Ocean	South America	Brazil	Rio Grande do Sul	Xangri-la	2010
Indian Ocean	Africa	Republic of South Africa	Eastern Cape	DIJ	2010
Pacific Ocean	Pacific Ocean Islands	USA	Hawaii	Kauai	2010
Indian Ocean	Africa	Mascarene Islands	Reunion Island	Saint-Benoit	2010
Indian Ocean	Africa	Republic of South Africa	Eastern Cape		2010
Indian Ocean-Red Sea	Africa	Egypt	DIJ	DIJ	2010
Atlantic Ocean	North America	USA	Florida	Volusia County	2010
Atlantic Ocean	North America	USA	North Carolina	Carteret County	2010
DIJ	Africa	Madagascar	Anstsiranana	DIJ	2010
Indian Ocean	Australia	Australia	Western Australia	Albany	2010
Atlantic Ocean North	North America	USA	Florida	Duval County	2010
Atlantic Ocean North	North America	USA	North Carolina	Carteret County	2010
South China Sea	Asia	Vietnam	Quy Nhon	Binh Dinh	2010
South China Sea	Asia	Vietnam	Binh Danh	DIJ	2010
Indian Ocean	Australia	Australia	New South Wales	DIJ	2010
South China Sea	Asia	Vietnam	Binh Danh Province	DIJ	2010
Atlantic Ocean North	North America	USA	South Carolina	Beaufort County	2010
Atlantic Ocean	North America	USA	North Carolina	Onslow County	2010
Pacific Ocean	North America	USA	California	San Luis Obispo County	2010
Indian Ocean	Africa	Republic of South Africa	Kwazulu-Natal	DIJ	2010
Gulf of Mexico	North America	USA	Texas	Galveston County	2010
Indian Ocean	Africa	Republic of South Africa	Eastern cape	DIJ	2010
Atlantic Ocean	North America	USA	North Carolina	New Hanover County	2010
Atlantic Ocean North	North America	USA	Florida	Volusia County	2010
Atlantic Ocean North	North America	USA	South Carolina	Horry County	2010
Atlantic Ocean	North America	USA	South Carolina	Beaufort County	2010
Atlantic Ocean	North America	USA	Florida	Duval County	2010
Atlantic Ocean	North America	USA	South Carolina	Charleston County	2010
Atlantic Ocean	Africa	Spain	Canary Islands	Gran Canaria	2010
Atlantic Ocean	North America	USA	Florida	St. Johns County	2010
Pacific Ocean	Australia	Australia	Western Australia	DIJ	2010
Atlantic Ocean	North America	USA	Florida	St. Johns County	2010
Atlantic Ocean North	North America	USA	Florida	Brevard County	2010
Pacific Ocean	Australia	Australia	New South Wales	DIJ	2010
Pacific Ocean	North America	USA	California	San Diego County	2010
Atlantic Ocean	North America	USA	North Carolina	Carteret County	2010
Pacific Ocean	Pacific Ocean Islands	Solomon Islands	Solomon Islands	DIJ	2010
Pacific Ocean	Pacific Ocean Islands	Tonga	DIJ	DIJ	2010
Atlantic Ocean	North America	USA	Florida	St. Johns County	2010
Atlantic Ocean	North America	USA	Florida	Volusia County	2010
Atlantic Ocean	North America	USA	Georgia	Camden	2010
Pacific Ocean	Australia	Australia	New South Wales	DIJ	2010
Atlantic Ocean	North America	USA	Florida	Volusia County	2010
Atlantic Ocean North	North America	USA	Florida	Volusia County	2010
Atlantic Ocean	North America	USA	Virginia	Virginia Beach	2010
Pacific Ocean Area; harbor or bay	North America	USA	Oregon	DIJ	2010
Pacific Ocean Area; harbor or bay	Africa	Republic of South Africa	Western Cape	DIJ	2010
Atlantic Ocean	Caribbean Islands	Bahama Islands	Abaco Islands	Elbow Cay	2010
Pacific Ocean-Tasman Sea	Australia	Australia	New South Wales	DIJ	2010
Pacific Ocean	North America	USA	California	San Diego County	2010
Pacific Ocean North	North America	USA	California	Santa Barbara County	2010
Atlantic Ocean	North America	USA	Maine	DIJ	2010
Indian Ocean	Australia	Australia	Western Australia	DIJ	2010
Pacific Ocean Area; harbor or bay	Pacific Ocean Islands	USA	Hawaii	Maui	2010
Pacific Ocean	Pacific Ocean Islands	USA	Hawaii	French Frigate Shoals	2010
Pacific Ocean	Pacific Ocean Islands	Fiji Islands	DIJ	Viti Levu	2010
Pacific Ocean	Pacific Ocean Islands	USA	Hawaii	Maui	2010
Caribbean Sea Islands	Caribbean Islands	Bahama Islands		DIJ	2010
Atlantic Ocean	North America	USA	Florida	Volusia County	2010
Pacific Ocean North	North America	USA	Washington	DIJ	2010
Atlantic Ocean	Africa	Republic of South Africa	Western Cape	DIJ	2010
Indian Ocean	Australia	Australia	Western Australia	DIJ	2010
Red Sea	Africa	Egypt	Sharm El Sheikh	Coral Bay	2010
Red Sea	Africa	Egypt	Sharm El Sheikh	Coral Bay	2010
Red Sea	Africa	Egypt	Sharm El Sheikh	Coral Bay	2010
Red Sea	Africa	Egypt	Sharm El Sheikh	Coral Bay	2010
Red Sea	Africa	Egypt	Sharm El Sheikh	Garden Bay	2010
Atlantic Ocean	North America	USA	Texas	Galveston County	2010
Atlantic Ocean	North America	USA	Florida	St. Johns County	2010
Pacific Ocean South	Australia	Australia	New South Wales	DIJ	2009
Pacific Ocean South	Australia	Australia	Tasmania	DIJ	2009
Pacific Ocean South	Australia	Australia	New South Wales	DIJ	2009
Pacific Ocean Islands	South America	Ecuador	Galapagos Islands	DIJ	2009
Indian Ocean Islands	Africa	Republic of South Africa	Eastern Cape	DIJ	2009
Pacific Ocean South	Australia	Australia	New South Wales	DIJ	2009
Pacific Ocean South	Australia	Australia	New South Wales	DIJ	2009
Pacific Ocean Area; harbor or bay	Australia	Australia	New South Wales	Cumberland	2009
Pacific Ocean Area; harbor or bay	Australia	Australia	New South Wales	DIJ	2009
Pacific Ocean South	Australia	Australia	New South Wales	DIJ	2009
Pacific Ocean South	Australia	Australia	New South Wales	DIJ	2009
Pacific Ocean South	Australia	Australia	New South Wales	DIJ	2009
Pacific Ocean South	Pacific Ocean Islands	New Caledonia	DIJ	DIJ	2009
Indian Ocean	Africa	Republic of South Africa	Eastern Cape	DIJ	2009
Atlantic Ocean North	North America	USA	Florida	Volusia County	2009
Pacific Ocean Islands	Pacific Ocean Islands	USA	Hawaii	Hawaii	2009
Indian Ocean	Australia	Australia	Western Australia	DIJ	2009
Gulf of Mexico	North America	USA	Florida	Lee County	2009
Atlantic Ocean North	North America	USA	Florida	Palm Beach County	2009
Atlantic Ocean North	North America	USA	Florida	Volusia County	2009
Pacific Ocean North	North America	USA	California	San Diego County	2009
Atlantic Ocean North	North America	USA	Florida	Volusia County	2009
Atlantic Ocean North	North America	USA	Florida	Volusia County	2009
Gulf of Mexico	North America	USA	Florida	Pinellas County	2009
Indian Ocean Islands	Asia	Indonesia	Rote	DIJ	2009
Indian Ocean- Red Sea	Africa	Egypt	Red Sea	DIJ	2009
Red Sea and Gulf of Aden	Africa	Egypt	DIJ	DIJ	2009
Red Sea and Gulf of Aden	Africa	Egypt	DIJ	DIJ	2009
Atlantic Ocean North	North America	USA	Florida	Brevard County	2009
Pacific Ocean South	Australia	Australia	New South Wales	DIJ	2009
Atlantic Ocean North	North America	USA	Florida	Volusia County	2009
Southern Ocean	Africa	Republic of South Africa	Western Cape	southern cape	2009
Gulf of Mexico	North America	USA	Florida	Pinellas County	2009
Atlantic Ocean	North America	USA	Florida	Brevard County	2009
Atlantic Ocean	North America	USA	North Carolina	Brunswick County	2009
Atlantic Ocean	North America	USA	Georgia	chathem	2009
Gulf of Mexico	North America	USA	Texas	Cameron County	2009
Coral Sea	Australia	Australia	New South Wales	Rous	2009
Pacific Ocean	Pacific Ocean Islands	USA	Hawaii	Hawaii	2009
Atlantic Ocean North	North America	USA	Florida	Volusia County	2009
Southern Ocean	Africa	Republic of South Africa	Western Cape	Souther Cape	2009
Pacific Ocean	North America	USA	California	San Diego County	2009
Indian Ocean	Australia	Australia	Cocos (Keeling) Islands	DIJ	2009
Atlantic Ocean North	North America	USA	Florida	Monroe County	2009
Pacific Ocean	Pacific Ocean Islands	USA	Hawaii	Maui	2009
Coral Sea	Australia	Australia	New South Wales	DIJ	2009
Pacific Ocean	North America	USA	California	San Diego County	2009
Indian Ocean	Australia	Australia	South Australia	DIJ	2009
Atlantic Ocean	North America	USA	Florida	Volusia County	2009
Atlantic Ocean	North America	USA	Florida	Palm Beach County	2009
Atlantic Ocean	North America	USA	Florida	Palm Beach County	2009
Atlantic Ocean	North America	USA	Florida	Volusia County	2009
Atlantic Ocean North	North America	USA	Florida	Brevard County	2009
Indian Ocean	Australia	Australia	New South Wales	DIJ	2009
Indian Ocean	Africa	Republic of South Africa	Eastern cape	DIJ	2009
Atlantic Ocean	North America	USA	Florida	Brevard County	2009
Indian Ocean	Africa	Mozambique	DIJ	DIJ	2009
Indian Ocean	Africa	Republic of South Africa	Eastern Cape	DIJ	2009
Indian Ocean	Australia	Australia	Western Australia	DIJ	2009
Pacific Ocean	North America	USA	California	San Diego County	2009
Indian Ocean	Australia	Australia	New South Wales	DIJ	2009
South China Sea	Asia	Vietnam	Binh Dahn	DIJ	2009
Pacific Ocean	Australia	Australia	New South Wales	DIJ	2009
Pacific Ocean	Australia	Australia	New South Wales	DIJ	2009
Pacific Ocean	Australia	Australia	New South Wales	DIJ	2009
South China Sea	Asia	Vietnam	Binh Danh Province	DIJ	2009
South China Sea	Asia	Vietnam	Binh Dinh	DIJ	2009
DIJ	South America	Brazil	Maranhao	DIJ	2009
Atlantic Ocean North	North America	USA	Florida	Brevard County	2008
Atlantic Ocean North	North America	USA	Florida	Brevard County	2008
Pacific Ocean South	Australia	Australia	New South Wales	DIJ	2008
Pacific Ocean South	Australia	Australia	New South Wales	DIJ	2008
Pacific Ocean South	Australia	Australia	Victoria	DIJ	2008
Atlantic Ocean North	North America	USA	Florida	Volusia County	2008
Atlantic Ocean North	North America	USA	Florida	Brevard County	2008
Atlantic Ocean North	North America	USA	Florida	Volusia County	2008
Pacific Ocean South	Australia	Australia	New South Wales	DIJ	2008
Atlantic Ocean North	North America	USA	Florida	Volusia County	2008
Indian Ocean Islands	Africa	Seychelles	DIJ	DIJ	2008
Atlantic Ocean North	North America	USA	Florida	Volusia County	2008
Pacific Ocean North	North America	USA	California	San Diego County	2008
Atlantic Ocean North	North America	USA	Florida	Volusia County	2008
Atlantic Ocean North	North America	USA	Florida	Volusia County	2008
Pacific Ocean North	North America	Mexico	Guerrero	DIJ	2008
Great Australian Bight	Australia	Australia	Western Australia	DIJ	2008
Pacific Ocean North	North America	Mexico	Sinaloa	DIJ	2008
Pacific Ocean North	North America	Mexico	Guerrero	DIJ	2008
Atlantic Ocean South	South America	Brazil	Pernambuco	Jaboatao dos Guararapes	2008
Atlantic Ocean South	South America	Brazil	Pernambuco	Olinda	2008
Atlantic Ocean North	North America	USA	South Carolina	Horry County	2008
Atlantic Ocean North	North America	USA	Florida	Brevard County	2008
Atlantic Ocean North	North America	USA	Florida	Nassau County	2008
Atlantic Ocean North	North America	USA	South Carolina	Charleston County	2008
Atlantic Ocean North	North America	USA	Florida	Volusia County	2008
Atlantic Ocean North	North America	USA	Florida	Volusia County	2008
Atlantic Ocean North	North America	USA	North Carolina	Onslow County	2008
Atlantic Ocean North	North America	USA	North Carolina	Onslow County	2008
Indian Ocean	Australia	Australia	Victoria	DIJ	2008
Atlantic Ocean North	North America	USA	Florida	Volusia County	2008
Gulf of Mexico	North America	USA	Florida	Lee County	2008
Atlantic Ocean	North America	USA	Florida	Volusia County	2008
Atlantic Ocean	North America	USA	Florida	Volusia County	2008
Atlantic Ocean	North America	USA	Florida	Volusia County	2008
Pacific Ocean South	Australia	Australia	New South Wales	DIJ	2008
Pacific Ocean Area; harbor or bay	Australia	Australia	New South Wales	Rous	2008
Atlantic Ocean	North America	USA	Florida	Volusia County	2008
Atlantic Ocean	North America	USA	Florida	Volusia County	2008
Pacific Ocean Islands	Pacific Ocean Islands	USA	Hawaii	Oahu	2008
Atlantic Ocean	North America	USA	Florida	Volusia County	2008
Pacific Ocean	North America	USA	California	Santa Barbara County	2008
Atlantic Ocean South	North America	USA	Florida	Volusia County	2008
Atlantic Ocean North	North America	USA	Florida	Volusia County	2008
Atlantic Ocean North	North America	USA	North Carolina	DIJ	2008
Tasman Sea	Australia	Australia	New South Wales	Forster	2008
Atlantic Ocean	North America	USA	Florida	St. Johns County	2008
Pacific Ocean South	Australia	Australia	New South Wales	DIJ	2008
Atlantic Ocean North	North America	USA	Florida	St. Lucie County	2008
Pacific Ocean Islands	South America	Ecuador	Galapagos Islands	DIJ	2008
Atlantic Ocean North	North America	USA	Florida	Martin County	2008
Pacific Ocean North	North America	Mexico	Baja California	DIJ	2008
Atlantic Ocean	North America	USA	Florida	Dade County	2008
Atlantic Ocean	North America	USA	Florida	Brevard County	2008
DIJ	South America	Brazil	Bahia	Guarajuba	2008
Pacific Ocean Islands	Pacific Ocean Islands	USA	Hawaii	Kauai	2007
Pacific Ocean South	Australia	Australia	New South Wales	DIJ	2007
Pacific Ocean South	Australia	Australia	New South Wales	DIJ	2007
Atlantic Ocean North	North America	USA	Florida	Martin County	2007
Pacific Ocean South	Australia	Australia	Queensland	DIJ	2007
Pacific Ocean South	Australia	Australia	New South Wales	DIJ	2007
Atlantic Ocean North	North America	USA	Florida	Palm Beach County	2007
Atlantic Ocean North	North America	USA	Florida	St. Lucie County	2007
Atlantic Ocean North	North America	USA	Florida	St. Lucie County	2007
Atlantic Ocean North	North America	USA	Florida	Volusia County	2007
Atlantic Ocean North	North America	USA	Florida	St. Lucie County	2007
Atlantic Ocean North	North America	USA	Florida	Volusia County	2007
Gulf of Carpentaria	Australia	Australia	Queensland	DIJ	2007
Atlantic Ocean North	North America	USA	Florida	Collier County	2007
Pacific Ocean Islands	Pacific Ocean Islands	USA	Hawaii	Maui	2007
Atlantic Ocean North	North America	USA	South Carolina	Horry County	2007
Pacific Ocean South	Australia	Australia	New South Wales	DIJ	2007
Pacific Ocean Islands	Pacific Ocean Islands	USA	Hawaii	Oahu	2007
Gulf of Mexico	North America	USA	Texas	Galveston County	2007
Atlantic Ocean North	North America	USA	Florida	Volusia County	2007
Atlantic Ocean North	North America	USA	Florida	Volusia County	2007
Atlantic Ocean North	North America	USA	North Carolina	Carteret County	2007
Gulf of Mexico	North America	USA	Florida	Sarasota County	2007
Pacific Ocean Islands	Pacific Ocean Islands	USA	Hawaii	Oahu	2007
Atlantic Ocean North	North America	USA	North Carolina	Onslow County	2007
Indian Ocean	Australia	Australia	Western Australia	DIJ	2007
Atlantic Ocean North	North America	USA	Florida	Volusia County	2007
Atlantic Ocean North	North America	USA	Florida	Volusia County	2007
Pacific Ocean North	North America	USA	California	Los Angeles County	2007
Pacific Ocean South	Australia	Australia	New South Wales	DIJ	2007
Gulf of Mexico	North America	USA	Florida	Sarasota County	2007
Atlantic Ocean Islands	North America	USA	Florida	Florida Keys	2007
Atlantic Ocean North	North America	USA	South Carolina	Charleston County	2007
Atlantic Ocean North	North America	USA	South Carolina	Charleston County	2007
Atlantic Ocean North	North America	USA	Florida	Volusia County	2007
Atlantic Ocean North	North America	USA	Florida	Volusia County	2007
Atlantic Ocean North	North America	USA	Florida	Volusia County	2007
Atlantic Ocean North	North America	USA	Florida	Volusia County	2007
Atlantic Ocean North	North America	USA	South Carolina	Horry County	2007
Atlantic Ocean North	North America	USA	Florida	Volusia County	2007
Atlantic Ocean North	North America	USA	Florida	Volusia County	2007
Pacific Ocean North	North America	USA	California	Monterey County	2007
Pacific Ocean Islands	Pacific Ocean Islands	USA	Hawaii	Oahu	2007
Atlantic Ocean North	North America	USA	Florida	Volusia County	2007
Atlantic Ocean North	North America	USA	Florida	Broward County	2007
Atlantic Ocean North	North America	USA	Florida	Volusia County	2007
Atlantic Ocean North	North America	USA	Florida	St. Lucie County	2007
Pacific Ocean Islands	Pacific Ocean Islands	New Caledonia	DIJ	DIJ	2007
Atlantic Ocean North	North America	USA	Florida	Flagler County	2007
Atlantic Ocean North	North America	USA	Florida	Volusia County	2007
Atlantic Ocean North	North America	USA	Florida	Duval County	2007
Pacific Ocean North	North America	USA	California	Humboldt County	2007
Atlantic Ocean North	North America	USA	South Carolina	Charleston County	2007
Pacific Ocean Islands	Pacific Ocean Islands	New Caledonia	Loyalty Islands Province	Lifou	2007
Pacific Ocean South	Australia	Australia	New South Wales	DIJ	2007
Atlantic Ocean North	North America	USA	Florida	Brevard County	2007
Pacific Ocean Islands	Pacific Ocean Islands	USA	Hawaii	Maui	2007
Pacific Ocean Islands	Pacific Ocean Islands	Fiji Islands	DIJ	DIJ	2007
Atlantic Ocean North	North America	USA	Florida	Indian River County	2007
Indian Ocean	Africa	Republic of South Africa	Eastern Cape	DIJ	2007
Atlantic Ocean South	Africa	Republic of South Africa	Western Cape	DIJ	2007
Atlantic Ocean South	North America	USA	Florida	Volusia County	2007
Pacific Ocean South	Australia	Australia	New South Wales	DIJ	2007
Pacific Ocean South	Pacific Ocean Islands	New Zealand	South Island	Canterbury	2007
Pacific Ocean Islands	Pacific Ocean Islands	USA	Hawaii	Oahu	2007
Pacific Ocean South	Australia	Australia	New South Wales	DIJ	2007
Pacific Ocean South	Australia	Australia	Queensland	DIJ	2007
Pacific Ocean Islands	South America	Ecuador	DIJ	DIJ	2007
Pacific Ocean	North America	USA	California	San Francisco County	2007
Indian Ocean	Africa	Mascarene Islands	Reunion Island	Saint-Paul	2007
Sea of Cortez	North America	Mexico	Baja California	DIJ	2006
Atlantic Ocean	North America	USA	Florida	Indian River County	2006
Pacific Ocean South	Australia	Australia	Queensland	DIJ	2006
Indian Ocean	Africa	Republic of South Africa	Eastern Cape	Buffalo City	2006
Pacific Ocean South	Australia	Australia	Queensland	DIJ	2006
Pacific Ocean Islands	Pacific Ocean Islands	Tonga	Vavau island group	DIJ	2006
Pacific Ocean South	Australia	Australia	New South Wales	DIJ	2006
Caribbean Sea Islands	North America	USA	Florida	Florida Keys	2006
Pacific Ocean Islands	Pacific Ocean Islands	Fiji Islands	DIJ	DIJ	2006
Pacific Ocean	Pacific Ocean Islands	USA	Hawaii	Maui	2006
Pacific Ocean	Pacific Ocean Islands	USA	Hawaii	Oahu	2006
Atlantic Ocean North	North America	USA	Florida	St. Lucie County	2006
Pacific Ocean	Australia	Australia	New South Wales	DIJ	2006
Atlantic Ocean North	North America	USA	Florida	Volusia County	2006
Atlantic Ocean North	North America	USA	Florida	Brevard County	2006
Gulf of Mexico	North America	USA	Florida	Collier County	2006
Pacific Ocean Islands	Pacific Ocean Islands	USA- Guam	Guam Island	DIJ	2006
Atlantic Ocean North	South America	Brazil	Pernambuco	Recife	2006
Gulf of Mexico	North America	USA	Florida	Manatee County	2006
Gulf of Mexico	North America	USA	Florida	Manatee County	2006
Atlantic Ocean	North America	USA	South Carolina	Beaufort County	2006
Pacific Ocean	North America	USA	Oregon	Curry	2006
Atlantic Ocean North	North America	USA	Florida	Volusia County	2006
Atlantic Ocean South	South America	Brazil	Pernambuco	Olinda	2006
Atlantic Ocean North	North America	USA	Florida	St. Lucie County	2006
Atlantic Ocean	North America	USA	South Carolina	Georgetown County	2006
Atlantic Ocean	North America	USA	South Carolina	Charleston County	2006
Atlantic Ocean North	North America	USA	Florida	St. Johns County	2006
Atlantic Ocean North	North America	USA	Florida	Brevard County	2006
Atlantic Ocean South	South America	Brazil	Pernambuco	Jaboatao dos Guararapes	2006
Atlantic Ocean	North America	USA	South Carolina	Beaufort County	2006
Atlantic Ocean North	North America	USA	Florida	Volusia County	2006
Atlantic Ocean North	Caribbean Islands	Puerto Rico	Carollina	DIJ	2006
Atlantic Ocean North	North America	USA	Florida	Brevard County	2006
Atlantic Ocean South	Africa	Republic of South Africa	Western Cape	City of Capetown	2006
Atlantic Ocean South	Africa	Republic of South Africa	Western Cape	City of Cape Town	2006
Indian Ocean Islands	Africa	Mascarene Islands	Reunion Island	Saint-Pierre	2006
Caribbean Sea Islands	Caribbean Islands	Bahama Islands	Abaco Islands	DIJ	2006
Pacific Ocean North	North America	USA	Oregon	Lane County	2006
Atlantic Ocean North	North America	USA	Florida	Volusia County	2006
Atlantic Ocean North	North America	USA	Florida	Volusia County	2006
Atlantic Ocean South	Africa	Republic of South Africa	Western Cape	City of Cape town	2006
Indian Ocean	Australia	Australia	New South Wales	DIJ	2006
Atlantic Ocean North	North America	USA	Florida	Palm Beach County	2006
Atlantic Ocean North	North America	USA	North Carolina	Onslow County	2006
Atlantic Ocean North	North America	USA	New Jersey	Ocean	2006
Atlantic Ocean North	North America	USA	Florida	Volusia County	2006
Atlantic Ocean North	North America	USA	Florida	Volusia County	2006
Atlantic Ocean North	North America	USA	Florida	Volusia County	2006
Gulf of Mexico Islands	North America	USA	Texas	Cameron County	2006
Caribbean Sea Islands	Caribbean Islands	Bahama Islands	Grand Bahama Island	DIJ	2006
Pacific Ocean Islands	Pacific Ocean Islands	USA	Hawaii	Maui	2006
Pacific Ocean North	North America	USA	Oregon	Lincoln County	2006
Indian Ocean	Australia	Australia	Western Australia	DIJ	2006
Pacific Ocean South	Pacific Ocean Islands	New Zealand	North Island	Waikato	2006
Pacific Ocean North	North America	USA	California	Marin County	2006
Pacific Ocean South	Australia	Australia	Victoria	DIJ	2006
Atlantic Ocean	North America	USA	Florida	St. Johns County	2006
DIJ	Africa	Mascarene Islands	Reunion Island	Saint-Paul	2006
Atlantic Ocean North	Caribbean Islands	Bahama Islands	Abaco Islands	Castaway Cay	2005
Indian Ocean Area; creek or river	Australia	Australia	Queensland	DIJ	2005
Indian Ocean Islands	Australia	Australia	Western Australia	DIJ	2005
Indian Ocean	Australia	Australia	New South Wales	DIJ	2005
Pacific Ocean	Pacific Ocean Islands	USA	Hawaii	Oahu	2005
Atlantic Ocean	Africa	Republic of South Africa	Western Cape	DIJ	2005
Gulf of Mexico	North America	USA	Texas	Cameron County	2005
Atlantic Ocean North	North America	USA	Florida	St. Johns County	2005
Gulf of Mexico	North America	USA	Florida	Sarasota County	2005
Pacific Ocean	Pacific Ocean Islands	USA	Hawaii	Maui	2005
Atlantic Ocean North	North America	USA	Florida	Duval County	2005
Atlantic Ocean North	North America	USA	Florida	Brevard County	2005
Pacific Ocean	Australia	Australia	New South Wales	Sydney	2005
Indian Ocean	Africa	Republic of South Africa	Eastern Cape	DIJ	2005
Atlantic Ocean	North America	USA	Florida	Volusia County	2005
Gulf of Mexico	North America	USA	Texas	Nueces County	2005
Atlantic Ocean	North America	USA	New Jersey	Ocean Couny	2005
Pacific Ocean	Asia	South Korea	South Chungchong Province	Taean County	2005
Sea of Cortez	North America	Mexico	Baja California Sur	DIJ	2005
Pacific Ocean Islands	Pacific Ocean Islands	Vanuatu	Malekula Island	DIJ	2005
Gulf of Mexico	North America	USA	Florida	Walton County	2005
Gulf of Mexico	North America	USA	Florida	Lee County	2005
Gulf of Mexico	North America	USA	Texas	Galveston County	2005
Atlantic Ocean North	North America	USA	North Carolina	Brunswick County	2005
Atlantic Ocean North	North America	USA	Florida	Volusia County	2005
Atlantic Ocean North	North America	USA	Florida	Volusia County	2005
Atlantic Ocean	North America	USA	Florida	Volusia County	2005
Pacific Ocean Islands	Pacific Ocean Islands	Fiji Islands	Central district	Tailevu	2005
Atlantic Ocean	North America	USA	South Carolina	Charleston County	2005
Atlantic Ocean North	North America	USA	South Carolina	Charleston County	2005
Gulf of Mexico	North America	USA	Texas	Galveston County	2005
Atlantic Ocean North	North America	USA	South Carolina	Horry County	2005
Atlantic Ocean North	North America	USA	South Carolina	Horry County	2005
Pacific Ocean South	Australia	Australia	South Australia	DIJ	2005
Indian Ocean	Australia	Australia	South Australia	DIJ	2005
Atlantic Ocean North	North America	USA	North Carolina	Onslow County	2005
Atlantic Ocean North	North America	USA	Florida	Volusia County	2005
Indian Ocean	Australia	Australia	New South Wales	DIJ	2005
Atlantic Ocean North	North America	USA	South Carolina	Horry County	2005
Indian Ocean	Australia	Australia	Western Australia	Perth	2005
Great Australian Bight	Australia	Australia	South Australia	DIJ	2005
Pacific Ocean	Pacific Ocean Islands	USA	Hawaii	Maui	2005
Pacific Ocean North	North America	USA	California	Sonoma County	2005
Pacific Ocean North	North America	USA	California	Del Norte County	2005
Atlantic Ocean South	Africa	Republic of South Africa	Western Cape	Overberg	2005
Pacific Ocean North	North America	USA	California	San Mateo County	2005
Caribbean Sea	Caribbean Islands	Netherland Antilles	Saint Maarten	DIJ	2005
Atlantic Ocean North	North America	USA	Florida	Volusia County	2005
Atlantic Ocean North	North America	USA	Florida	Volusia County	2005
Atlantic Ocean North	North America	USA	Florida	Martin County	2005
Indian Ocean	Australia	Australia	Victoria	DIJ	2005
Indian Ocean	Africa	Republic of South Africa	Eastern Cape	DIJ	2005
Atlantic Ocean North	North America	USA	Florida	Volusia County	2005
Gulf of Mexico	North America	USA	Florida	Gulf County	2005
Pacific Ocean North	Pacific Ocean Islands	USA	Hawaii	Maui	2005
Pacific Ocean North	North America	USA	Oregon	Clatsop County	2005
Atlantic Ocean North	North America	USA	Florida	Dade County	2005
Atlantic Ocean South	South America	Brazil	Bahia	Ilheus	2005
Pacific Ocean South	Pacific Ocean Islands	Fiji Islands	DIJ	Yasawa Islands	2004
South Pacific Ocean	Australia	Australia	New South Wales	DIJ	2004
Caribbean Sea	South America	Venezuela	Anzo�tegui	DIJ	2004
Indian Ocean	Australia	Australia	Western Australia		2004
Red Sea and Gulf of Aden	Africa	Egypt	Sinai Peninsula	DIJ	2004
Pacific Ocean South	Pacific Ocean Islands	New Zealand	South Island	Otago	2004
Atlantic Ocean South	South America	Brazil	Pernambuco	Jaboatao dos Guararapes	2004
Caribbean Sea	Caribbean Islands	Cuba	Santiago de Cuba	Guama	2004
Pacific Ocean	Pacific Ocean Islands	USA	Hawaii	Kauai	2004
Atlantic Ocean South	South America	Brazil	Pernambuco	Recife	2004
Atlantic Ocean North	North America	USA	Florida	Martin County	2004
Gulf of Mexico Islands	North America	USA	Florida	Lee County	2004
Atlantic Ocean South	Africa	Republic of South Africa	Western Cape	Muizenberg	2004
Pacific Ocean	Pacific Ocean Islands	USA	Hawaii	Maui	2004
Atlantic Ocean North	North America	USA	Florida	Palm Beach County	2004
Gulf of Mexico	North America	USA	Texas	Cameron County	2004
Atlantic Ocean	North America	USA	Florida	St. Johns County	2004
Atlantic Ocean	South America	Brazil	Pernambuco	Jaboatao dos Guararapes	2004
Atlantic Ocean	South America	Brazil	Pernambuco	Jaboatao dos Guararapes	2004
Gulf of Mexico	North America	USA	Texas	Galveston County	2004
Pacific Ocean	North America	USA	California	Sonoma County	2004
Atlantic Ocean	North America	USA	Florida	St. Johns County	2004
Atlantic Ocean	North America	USA	Florida	Duval County	2004
Atlantic Ocean North	North America	USA	Florida	Volusia County	2004
Indian Ocean	Australia	Australia	Western Australia	Burnbury	2004
Gulf of Mexico	North America	USA	Alabama	Baldwin	2004
Indian Ocean	Australia	Australia	Western Australia	DIJ	2004
Gulf of Mexico	North America	USA	Texas	Galveston County	2004
Atlantic Ocean	North America	USA	North Carolina	New Hanover County	2004
Atlantic Ocean	North America	USA	Florida	Brevard County	2004
Gulf of Mexico	North America	USA	Florida	Pinellas County	2004
Pacific Ocean North	North America	USA	California	Mendocino County	2004
Atlantic Ocean	North America	USA	Florida	Volusia County	2004
Atlantic Ocean	North America	USA	Florida	Volusia County	2004
Pacific Ocean	Pacific Ocean Islands	USA	Hawaii	Hawaii	2004
Atlantic Ocean	North America	USA	South Carolina	Horry County	2004
Gulf of Mexico	North America	USA	Texas	Cameron County	2004
Pacific Ocean North	North America	USA	Oregon	Curry County	2004
Pacific Ocean North	North America	USA	California	San Luis Obispo County	2004
Pacific Ocean	North America	USA	California	Marin County	2004
Southern Ocean	Africa	Republic of South Africa	Western Cape	DIJ	2004
Indian Ocean	Africa	Mascarene Islands	Reunion Island	Saint-Pierre	2004
Pacific Ocean	Australia	Australia	New South Wales	DIJ	2004
Atlantic Ocean	North America	USA	North Carolina	Dare County	2004
Pacific Ocean	North America	USA	California	Humboldt County	2004
Indian Ocean	Africa	Republic of South Africa	Western Cape	DIJ	2004
Atlantic Ocean	North America	USA	Florida	Palm Beach County	2004
Indian Ocean	Africa	Republic of South Africa	Eastern Cape	DIJ	2004
Indian Ocean	Africa	Republic of South Africa	Eastern Cape	DIJ	2004
Indian Ocean	Australia	Australia	South Australia	DIJ	2004
Atlantic Ocean Islands	Caribbean Islands	Bahama Islands	Abaco Islands	DIJ	2004
Pacific Ocean	Australia	Australia	New South Wales	DIJ	2004
Indian Ocean	Australia	Australia	Western Australia	DIJ	2004
Pacific Ocean	Australia	Australia	New South Wales	DIJ	2004
Indian Ocean	Australia	Australia	Western Australia	DIJ	2004
Indian Ocean	Australia	Australia	Western Australia	DIJ	2004
Indian Ocean	Australia	Australia	Western Australia	DIJ	2004
Pacific Ocean	North America	USA	California	San Diego County	2004
Indian Ocean	Africa	Mascarene Islands	Reunion Island	Saint-Paul	2004
Indian Ocean	Africa	Mascarene Islands	Reunion Island	Saint-Benoit	2004
Atlantic Ocean	South America	Brazil	Pernambuco	Recife	2004
Pacific Ocean South	Pacific Ocean Islands	Papua New Guinea	Madang province	DIJ	2004
Mediterranean Sea	Africa	Egypt	DIJ	DIJ	2004
Indian Ocean	Australia	Australia	New South Wales	DIJ	2004
Atlantic Ocean Islands	Africa	Spain	Canary Islands	Isla De Tenerife	2004
Atlantic Ocean South	South America	Uruguay	DIJ	DIJ	2004
Indian Ocean	Australia	Australia	South Australia	Elliston	2003
Pacific Ocean; canal	Australia	Australia	Queensland	Brisbane	2003
Atlantic Ocean North	North America	USA	Florida	Palm Beach County	2003
Indian Ocean	Australia	Australia	South Australia	Adelaide	2003
Atlantic Ocean North	North America	USA	Florida	Volusia County	2003
Atlantic Ocean North	North America	USA	Florida	Brevard County	2003
Atlantic Ocean North	North America	USA	Florida	Brevard County	2003
Atlantic Ocean North	North America	USA	Florida	Brevard County	2003
Atlantic Ocean North	North America	USA	Florida	Volusia County	2003
Atlantic Ocean North	North America	USA	Florida	Brevard County	2003
Atlantic Ocean North	North America	USA	Florida	Brevard County	2003
Atlantic Ocean North	North America	USA	Florida	Volusia County	2003
Atlantic Ocean North	North America	USA	Florida	Brevard County	2003
Atlantic Ocean North	North America	USA	Florida	Volusia County	2003
Atlantic Ocean North	North America	USA	Florida	Volusia County	2003
Pacific Ocean North	Pacific Ocean Islands	USA	Hawaii	Hawaii	2003
Atlantic Ocean South	South America	Brazil	Rio de Janeiro	Rio de Janeiro	2003
Atlantic Ocean North	North America	USA	Florida	Volusia County	2003
Coogee Bay	Australia	Australia	New South Wales	DIJ	2003
Atlantic Ocean Area; harbor or bay	North America	USA	Florida	Palm Beach County	2003
Pacific Ocean North	Pacific Ocean Islands	USA	Hawaii	Johnston Island	2003
Pacific Ocean Islands	Pacific Ocean Islands	USA	Hawaii	Oahu	2003
Atlantic Ocean North	North America	USA	Florida	Brevard County	2003
Atlantic Ocean North	North America	USA	Florida	St. Johns County	2003
Atlantic Ocean North	North America	USA	Florida	Volusia County	2003
Atlantic Ocean North	North America	USA	Florida	Volusia County	2003
Atlantic Ocean North	North America	USA	Florida	Volusia County	2003
Atlantic Ocean North	South America	Venezuela	Sucre	Isla de Margarita	2003
Atlantic Ocean Area; harbor or bay	Africa	Republic of South Africa	Eastern Cape	DIJ	2003
Atlantic Ocean North	North America	USA	South Carolina	Horry County	2003
Pacific Ocean North	North America	USA	California	San Luis Obispo County	2003
Atlantic Ocean South	Africa	Republic of South Africa	Western Cape	DIJ	2003
Atlantic Ocean North	North America	USA	Florida	Volusia County	2003
Atlantic Ocean North	North America	USA	Florida	St. Johns County	2003
Atlantic Ocean North	Caribbean Islands	Virgin Islands	St. Thomas	DIJ	2003
Atlantic Ocean North	North America	USA	South Carolina	Charleston County	2003
Atlantic Ocean North	North America	USA	Florida	Volusia County	2003
Atlantic Ocean North	North America	USA	Florida	Volusia County	2003
Atlantic Ocean North	North America	USA	Florida	St. Lucie County	2003
Pacific Ocean Islands	Pacific Ocean Islands	Fiji Islands	DIJ	DIJ	2003
Pacific Ocean Islands	Pacific Ocean Islands	USA	Hawaii	Maui	2003
Atlantic Ocean North	North America	USA	Florida	Martin County	2003
Atlantic Ocean North	North America	USA	Florida	Volusia County	2003
Indian Ocean	Africa	Madagascar	Antsiranana	DIJ	2003
Pacific Ocean Islands	Pacific Ocean Islands	USA	Hawaii	Kauai	2003
Pacific Ocean South	Australia	Australia	New South Wales	DIJ	2003
Atlantic Ocean North	North America	USA	Florida	St. Johns County	2003
Atlantic Ocean North	North America	USA	Florida	Brevard County	2003
Indian Ocean	Asia	India	Tamil Nadu	DIJ	2003
Indian Ocean	Australia	Australia	Victoria	DIJ	2003
Atlantic Ocean North	North America	USA	Florida	Dade County	2003
Atlantic Ocean	North America	USA	North Carolina	Dare County	2003
Atlantic Ocean South	South America	Brazil	Sao Paulo	DIJ	2003
Pacific Ocean South	South America	Ecuador	Galapagos Islands	Santa Cruz Island	2003
Pacific Ocean	Australia	Australia	New South Wales	DIJ	2003
Pacific Ocean	Australia	Australia	New South Wales	DIJ	2003
Pacific Ocean Islands	Pacific Ocean Islands	USA	Hawaii	Maui	2002
Indian Ocean	Africa	Republic of South Africa	KwaZulu-Natal	DIJ	2002
Indian Ocean Area; creek or river	Australia	Australia	Western Australia	DIJ	2002
Pacific Ocean South	Australia	Australia	Queensland	DIJ	2002
Atlantic Ocean North	North America	USA	Florida	Volusia County	2002
Atlantic Ocean North	North America	USA	Florida	Volusia County	2002
Atlantic Ocean North	North America	USA	Florida	Brevard County	2002
Pacific Ocean Islands	Pacific Ocean Islands	USA	Hawaii	Kauai	2002
Atlantic Ocean North	North America	USA	Florida	Broward County	2002
Atlantic Ocean North	North America	USA	Florida	Florida Keys	2002
Atlantic Ocean North	North America	USA	Florida	Volusia County	2002
Atlantic Ocean North	North America	USA	Florida	Volusia County	2002
Atlantic Ocean North	North America	USA	Florida	St. Johns County	2002
Indian Ocean	Australia	Australia	South Australia	Adelaide	2002
Atlantic Ocean North	North America	USA	South Carolina	Georgetown County	2002
Atlantic Ocean North	North America	USA	Florida	Palm Beach County	2002
Gulf of Mexico	North America	USA	Florida	Franklin County	2002
Pacific Ocean North	North America	USA	California	Marin County	2002
Pacific Ocean North	Central America	Costa Rica	Playa Grande	DIJ	2002
Atlantic Ocean North	North America	USA	Florida	Martin County	2002
Pacific Ocean North	North America	USA	California	San Diego County	2002
Atlantic Ocean North	North America	USA	Florida	St. Johns County	2002
Atlantic Ocean North	North America	USA	Florida	Volusia County	2002
Atlantic Ocean North	North America	USA	North Carolina	New Hanover County	2002
Atlantic Ocean North	North America	USA	Florida	Volusia County	2002
Pacific Ocean Islands	Pacific Ocean Islands	USA	Hawaii	Kauai	2002
Atlantic Ocean North	North America	USA	North Carolina	Carteret County	2002
Atlantic Ocean North	North America	USA	South Carolina	Horry County	2002
Atlantic Ocean North	North America	USA	Florida	Brevard County	2002
Atlantic Ocean North	North America	USA	North Carolina	Onslow County	2002
Atlantic Ocean North	North America	USA	Florida	Volusia County	2002
Atlantic Ocean North	North America	USA	Florida	Volusia County	2002
Atlantic Ocean North	North America	USA	Florida	Volusia County	2002
Gulf of Mexico	Open Ocean	USA	Open Ocean/Sea	Open Ocean/Sea	2002
Gulf of Mexico	North America	USA	Texas	Galveston County	2002
Atlantic Ocean North	North America	USA	Florida	Volusia County	2002
Atlantic Ocean North	North America	USA	Florida	Volusia County	2002
Pacific Ocean Islands	Pacific Ocean Islands	USA	Hawaii	Oahu	2002
Pacific Ocean North	North America	USA	California	Humboldt County	2002
Pacific Ocean North	North America	USA	Oregon	Tillamook	2002
Atlantic Ocean North	North America	USA	Florida	Volusia County	2002
Atlantic Ocean North	North America	USA	Florida	Brevard County	2002
Atlantic Ocean North	North America	USA	Florida	Volusia County	2002
Atlantic Ocean North	North America	USA	Florida	Volusia County	2002
Atlantic Ocean North	North America	USA	Florida	Volusia County	2002
Atlantic Ocean North	North America	USA	Florida	Volusia County	2002
Atlantic Ocean South	South America	Brazil	Pernambuco	Jaboatao dos Guararapes	2002
Atlantic Ocean South	South America	Brazil	Pernambuco	Jaboatao dos Guararapes	2002
Atlantic Ocean South	South America	Brazil	Pernambuco	Jaboatao dos Guararapes	2002
Pacific Ocean Islands	Pacific Ocean Islands	USA	Hawaii	Maui	2002
Atlantic Ocean North	North America	USA	Florida	Volusia County	2002
Atlantic Ocean North	North America	USA	Florida	Volusia County	2002
Pacific Ocean Islands	Pacific Ocean Islands	USA	Hawaii	Maui	2002
Pacific Ocean North	North America	USA	California	Sonoma County	2002
Atlantic Ocean Islands	Caribbean Islands	Bahama Islands	Exuma	Lee Stocking Island	2002
Pacific Ocean; canal	Australia	Australia	Queensland	Brisbane	2002
Atlantic Ocean South	Africa	Republic of South Africa	Western Cape	Cape Town	2002
Pacific Ocean South	Australia	Australia	Queensland	DIJ	2002
Atlantic Ocean	North America	USA	Florida	St. Johns County	2002
Indian Ocean	Africa	Republic of South Africa	KwaZulu-Natal	DIJ	2002
Atlantic Ocean South	South America	Brazil	Pernambuco	Jaboatao dos Guararapes	2002
Pacific Ocean	Australia	Australia	New South Wales	DIJ	2002
Pacific Ocean	Australia	Australia	New South Wales	DIJ	2002
Pacific Ocean Area; creek or river	Australia	Australia	Western Australia	DIJ	2002
Pacific Ocean South	Australia	Australia	New South Wales	DIJ	2002
Atlantic Ocean South	South America	Brazil	Pernambuco	Recife	2002
Caribbean Sea	Caribbean Islands	Cuba	Holguin	DIJ	2001
Pacific Ocean South	Australia	Australia	New South Wales	DIJ	2001
Pacific Ocean North	Pacific Ocean Islands	Marshall Islands	Kwajalein Atoll	DIJ	2001
Atlantic Ocean North	North America	USA	Florida	Volusia County	2001
Atlantic Ocean North	North America	USA	Florida	Volusia County	2001
Atlantic Ocean North	North America	USA	Florida	Volusia County	2001
Atlantic Ocean North	North America	USA	Florida	Volusia County	2001
Atlantic Ocean North	North America	USA	Florida	St. Lucie County	2001
Atlantic Ocean North	North America	USA	Florida	Volusia County	2001
Atlantic Ocean North	North America	USA	Florida	Volusia County	2001
Atlantic Ocean North	North America	USA	Florida	Volusia County	2001
Atlantic Ocean North	North America	USA	Florida	Volusia County	2001
Pacific Ocean North	Pacific Ocean Islands	USA	Hawaii	Oahu	2001
Pacific Ocean North	Pacific Ocean Islands	USA	Hawaii	Oahu	2001
Atlantic Ocean North	North America	USA	Florida	Volusia County	2001
Pacific Ocean South	Australia	Australia	Queensland	DIJ	2001
Atlantic Ocean North	North America	USA	Florida	Duval County	2001
Atlantic Ocean North	North America	USA	South Carolina	Beaufort County	2001
Atlantic Ocean North	North America	USA	South Carolina	Beaufort County	2001
Atlantic Ocean North	North America	USA	South Carolina	Charleston County	2001
Indian Ocean	Africa	Republic of South Africa	Eastern Cape	East London	2001
Pacific Ocean South	Africa	Republic of South Africa	Eastern Cape	East London	2001
Pacific Ocean South	Australia	Australia	New South Wales	DIJ	2001
Gulf of Mexico	North America	USA	Florida	Escambia County	2001
Pacific Ocean North	North America	Mexico	Baja California	DIJ	2001
Gulf of Mexico	North America	USA	Florida	Escambia County	2001
Atlantic Ocean North	North America	USA	Florida	Nassau County	2001
Atlantic Ocean North	North America	USA	Florida	Nassau County	2001
Atlantic Ocean North	North America	USA	South Carolina	Horry County	2001
Caribbean Sea	Caribbean Islands	Bahama Islands	Grand Bahama Island	DIJ	2001
Atlantic Ocean North	North America	USA	South Carolina	Horry County	2001
Caribbean Sea	Caribbean Islands	Bahama Islands	Grand Bahama Island		2001
Atlantic Ocean North	North America	USA	Florida	Volusia County	2001
Atlantic Ocean North	North America	USA	Florida	Volusia County	2001
Atlantic Ocean North	North America	USA	Florida	Volusia County	2001
Atlantic Ocean North	North America	USA	Florida	Volusia County	2001
Atlantic Ocean North	North America	USA	Florida	Volusia County	2001
Atlantic Ocean North	North America	USA	Florida	Volusia County	2001
Atlantic Ocean North	North America	USA	Florida	Volusia County	2001
Atlantic Ocean North	North America	USA	Florida	Volusia County	2001
Atlantic Ocean North	North America	USA	Florida	Volusia County	2001
Atlantic Ocean North	North America	USA	Florida	Volusia County	2001
Atlantic Ocean North	North America	USA	Florida	Volusia County	2001
Gulf of Mexico	North America	USA	Florida	Manatee County	2001
Atlantic Ocean North	North America	USA	Florida	Duval County	2001
Atlantic Ocean North	North America	USA	Virginia	Virginia Beach City	2001
Atlantic Ocean North	North America	USA	North Carolina	Dare County	2001
Atlantic Ocean North	North America	USA	North Carolina	Dare County	2001
Atlantic Ocean North	North America	USA	Florida	St. Lucie County	2001
Atlantic Ocean North	North America	USA	Florida	Volusia County	2001
Atlantic Ocean North	North America	USA	Florida	Volusia County	2001
Pacific Ocean North	North America	Mexico	Guerrero Territory	DIJ	2001
Caribbean Sea	Caribbean Islands	Turks and Caicos Islands	Turks and Caicos	Providenciales	2001
Atlantic Ocean North	North America	USA	Florida	Brevard County	2001
Gulf of Mexico	North America	USA	Alabama	Baldwin	2001
Gulf of Mexico	North America	USA	Texas	Kleberg County	2001
Pacific Ocean North	North America	USA	California	Monterey County	2001
Atlantic Ocean Islands	Africa	Cape Verde	Sao Vicente	DIJ	2001
Pacific Ocean North	Pacific Ocean Islands	USA	Hawaii	Maui	2001
Atlantic Ocean North	North America	USA	Florida	Broward County	2001
Indian Ocean	Africa	Republic of South Africa	KwaZulu-Natal	Durban	2001
Atlantic Ocean South	South America	Brazil	Bahia	Nova Vicosa	2001
Atlantic Ocean South	South America	Brazil	Rio Grande do Norte	Macau	2001
Atlantic Ocean South	South America	Brazil	Sao Paulo	DIJ	2001
Pacific Ocean South	Australia	Australia	New South Wales	Sydney	2001
Atlantic Ocean North	North America	USA	Florida	Brevard County	2001
Atlantic Ocean North	North America	USA	North Carolina	Onslow County	2001
Atlantic Ocean North	North America	USA	Georgia	DIJ	2001
DIJ	Caribbean Islands	Puerto Rico	DIJ	DIJ	2001
Pacific Ocean	Australia	Australia	Queensland	DIJ	2001
Indian Ocean	Australia	Australia	Western Australia	DIJ	2001
Pacific Ocean	Australia	Australia	New South Wales	DIJ	2001
Pacific Ocean	Australia	Australia	New South Wales	DIJ	2001
Pacific Ocean South	Australia	Australia	Western Australia	DIJ	2001
Indian Ocean	Africa	Republic of South Africa	DIJ	DIJ	2001
Atlantic Ocean South	South America	Brazil	Rio Grande do Sul	Tramandai	2001
Pacific Ocean South	Pacific Ocean Islands	Kiribati	Kanton Island	DIJ	2000
Atlantic Ocean North	North America	USA	Florida	Palm Beach County	2000
Atlantic Ocean North	North America	USA	Florida	Brevard County	2000
Atlantic Ocean North	North America	USA	Florida	Palm Beach County	2000
Atlantic Ocean South	Africa	Republic of South Africa	Western Cape		2000
Pacific Ocean South	Australia	Australia	New South Wales	Sydney	2000
Atlantic Ocean North	North America	USA	Florida	Palm Beach County	2000
Atlantic Ocean North	North America	USA	Florida	Palm Beach County	2000
Pacific Ocean South	Pacific Ocean Islands	Papua New Guinea	Madang Province	Long Island	2000
Pacific Ocean South	Pacific Ocean Islands	Papua New Guinea	Madang Province	Long Island	2000
Gulf of Mexico	North America	USA	Florida	Santa Rosa County	2000
Atlantic Ocean North	North America	USA	Florida	Volusia County	2000
Gulf of Mexico	North America	USA	Alabama	Baldwin County	2000
Gulf of Mexico	North America	USA	Alabama	Baldwin County	2000
Gulf of Mexico	North America	USA	Texas	Nueces County	2000
Atlantic Ocean North	North America	USA	Florida	Volusia County	2000
Pacific Ocean	Pacific Ocean Islands	USA	Hawaii	Maui	2000
Atlantic Ocean North	North America	USA	Florida	Volusia County	2000
Atlantic Ocean North	North America	USA	Florida	Volusia County	2000
Atlantic Ocean North	North America	USA	Florida	Volusia County	2000
Atlantic Ocean North	North America	USA	Florida	Volusia County	2000
Atlantic Ocean North	North America	USA	Florida	Volusia County	2000
Gulf of Mexico	North America	USA	Florida	Florida Keys	2000
Atlantic Ocean North	North America	USA	Florida	Brevard County	2000
Atlantic Ocean North	North America	USA	Florida	Indian River County	2000
Atlantic Ocean North	North America	USA	Florida	Indian River County	2000
Atlantic Ocean North	North America	USA	Florida	Volusia County	2000
Caribbean Sea Islands	Caribbean Islands	Bahama Islands	Grand Bahama Island	DIJ	2000
Atlantic Ocean North	North America	USA	North Carolina	New Hanover County	2000
Atlantic Ocean North	North America	USA	Florida	Volusia County	2000
Atlantic Ocean North	North America	USA	Florida	Duval County	2000
Atlantic Ocean North	North America	USA	North Carolina	Brunswick County	2000
Atlantic Ocean North	North America	USA	Florida	St. Johns County	2000
Caribbean Sea	Caribbean Islands	Bahama Islands	San Salvador	DIJ	2000
Indian Ocean	Africa	Republic of South Africa	Eastern Cape		2000
Atlantic Ocean North	North America	USA	Florida	Brevard County	2000
Atlantic Ocean North	North America	USA	Florida	Volusia County	2000
Atlantic Ocean North	North America	USA	Florida	St. Lucie County	2000
Gulf of Mexico	North America	USA	Florida	Pinellas County	2000
Gulf of Mexico	North America	USA	Texas	Nueces County	2000
Atlantic Ocean North	North America	USA	North Carolina	Currituck County	2000
Atlantic Ocean North	North America	USA	Florida	Brevard County	2000
Pacific Ocean South	Australia	Australia	South Australia	DIJ	2000
Pacific Ocean South	Australia	Australia	South Australia	DIJ	2000
Indian Ocean	Australia	Australia	South Australia	DIJ	2000
Pacific Ocean North	Asia	Japan	Okinawa Prefecture	Ryukyu Islands	2000
Pacific Ocean North	North America	USA	California	San Mateo County	2000
Atlantic Ocean North	North America	USA	North Carolina	New Hanover County	2000
Indian Ocean	Africa	Tanzania	DIJ	DIJ	2000
Indian Ocean	Africa	Tanzania	DIJ	DIJ	2000
Atlantic Ocean North	North America	USA	Florida	Volusia County	2000
Atlantic Ocean North	North America	USA	Florida	Volusia County	2000
Atlantic Ocean North	North America	USA	Florida	Palm Beach County	2000
Atlantic Ocean North	North America	USA	South Carolina	Charleston County	2000
Pacific Ocean North	Pacific Ocean Islands	USA	Hawaii	Maui	2000
Atlantic Ocean North	North America	USA	Florida	Palm Beach County	2000
Atlantic Ocean North	North America	USA	North Carolina	Carteret County	2000
Indian Ocean	Africa	Republic of South Africa	Eastern Cape	DIJ	2000
Pacific Ocean South	South America	Ecuador	Galapagos Islands	DIJ	2000
Indian Ocean	Africa	Republic of South Africa	Western Cape	Southern Cape	2000
Indian Ocean	Australia	Australia	Western Australia	DIJ	2000
Indian Ocean	Australia	Australia	Western Australia	DIJ	2000
Gulf of Mexico	North America	USA	Florida	Lee County	2000
Pacific Ocean North	North America	USA	California	Humboldt County	2000
Atlantic Ocean North	Caribbean Islands	Bahama Islands	New Providence	DIJ	2000
Pacific Ocean North	North America	USA	California	Humboldt County	2000
Pacific Ocean South	Pacific Ocean Islands	Fiji Islands	Taveuni	DIJ	2000
Caribbean Sea	Caribbean Islands	Bahama Islands	New Providence	DIJ	2000
Indian Ocean	Africa	Mascarene Islands	Reunion Island	Saint-Pierre	2000
Atlantic Ocean North	North America	USA	Florida	Brevard County	2000
Atlantic Ocean North	North America	USA	Florida	St. Lucie County	2000
Atlantic Ocean North	North America	USA	Florida	Indian River County	2000
Atlantic Ocean North	North America	USA	Florida	Brevard County	2000
Atlantic Ocean North	North America	USA	Florida	Dade County	2000
Gulf of Thailand	Asia	Thailand	Koh Pha-ngan	DIJ	2000
Indian Ocean	Africa	Tanzania	DIJ	DIJ	2000
Atlantic Ocean North	North America	USA	Florida	Brevard County	2000
Atlantic Ocean North	North America	USA	South Carolina	Charleston county	2000
Pacific Ocean South	Australia	Australia	New South Wales	DIJ	2000
Pacific Ocean	Australia	Australia	New South Wales	DIJ	2000
Pacific Ocean	Australia	Australia	Queensland	DIJ	2000
Indian Ocean	Australia	Australia	Western Australia	DIJ	2000
Indian Ocean	Australia	Australia	Western Australia	DIJ	2000
Pacific Ocean	Australia	Australia	New South Wales	DIJ	2000
DIJ	Australia	Australia	Western Australia	DIJ	2000
Great Australian Bight	Australia	Australia	South Australia	DIJ	2000
Pacific Ocean	Australia	Australia	Queensland	DIJ	2000
Pacific Ocean	Australia	Australia	Queensland	DIJ	2000
Atlantic Ocean North	North America	USA	Florida	Martin County	1999
Pacific Ocean	Pacific Ocean Islands	USA	Hawaii	Maui	1999
Atlantic Ocean South	South America	Brazil	Pernambuco	Recife	1999
Atlantic Ocean South	South America	Brazil	Rio de Janeiro	Niter� cityi	1999
Atlantic Ocean North	North America	USA	Florida	Palm Beach County	1999
Atlantic Ocean North	North America	USA	Florida	Duval County	1999
Gulf of Mexico	North America	USA	Florida	Franklin County	1999
Atlantic Ocean North	North America	USA	Florida	Volusia County	1999
Gulf of Mexico	North America	USA	Florida	Escambia County	1999
Gulf of Mexico	North America	USA	Florida	Florida Keys	1999
Atlantic Ocean North	North America	USA	Georgia	Glynn	1999
Atlantic Ocean North	North America	USA	Georgia	Glynn	1999
Atlantic Ocean North	North America	USA	Florida	Volusia County	1999
Atlantic Ocean North	North America	USA	Florida	Volusia County	1999
Pacific Ocean	Pacific Ocean Islands	USA	Hawaii	Hawaii	1999
Atlantic Ocean South	Africa	Republic of South Africa	Western Cape	False Bay	1999
Atlantic Ocean North	North America	USA	South Carolina	Horry County	1999
Atlantic Ocean South	Africa	Republic of South Africa	Western Cape	Cape Town	1999
Indian Ocean	Africa	Republic of South Africa	Eastern Cape	East London	1999
Atlantic Ocean North	North America	USA	Virginia	Virginia Beach	1999
Indian Ocean	Australia	Australia	South Australia	Minlaton	1999
Atlantic Ocean North	North America	USA	Florida	Volusia County	1999
Atlantic Ocean North	North America	USA	Florida	Volusia County	1999
Atlantic Ocean North	North America	USA	Florida	St. Lucie County	1999
Atlantic Ocean North	North America	USA	Florida	Volusia County	1999
Pacific Ocean North	North America	USA	California	San Diego County	1999
Atlantic Ocean North	North America	USA	Florida	Martin County	1999
Atlantic Ocean North	North America	USA	Florida	St. Johns County	1999
Indian Ocean	Africa	Republic of South Africa	Eastern Cape	DIJ	1999
Indian Ocean	Africa	Republic of South Africa	Eastern Cape	DIJ	1999
Indian Ocean	Africa	Republic of South Africa	Eastern Cape	East London	1999
Indian Ocean	Africa	Republic of South Africa	Eastern Cape	East London	1999
Atlantic Ocean South	North America	USA	Florida	Volusia County	1999
Pacific Ocean	Pacific Ocean Islands	USA	Hawaii	Hawaii	1999
Atlantic Ocean North	North America	USA	South Carolina	Charleston County	1999
Atlantic Ocean North	North America	USA	Florida	Volusia County	1999
Atlantic Ocean North	North America	USA	Florida	Brevard County	1999
Atlantic Ocean North	North America	USA	Florida	Brevard County	1999
Atlantic Ocean North	North America	USA	Florida	Brevard County	1999
Indian Ocean	Africa	Republic of South Africa	KwaZulu-Natal	Durban	1999
Atlantic Ocean North	North America	USA	Florida	Palm Beach County	1999
Atlantic Ocean North	North America	USA	Florida	Volusia County	1999
Pacific Ocean North	North America	USA	California	Santa Cruz County	1999
Pacific Ocean	Pacific Ocean Islands	USA	Hawaii	Hawaii	1999
Atlantic Ocean North	North America	USA	Florida	Brevard County	1999
Atlantic Ocean North	North America	USA	Florida	Palm Beach County	1999
Atlantic Ocean North	North America	USA	Florida	Palm Beach County	1999
Atlantic Ocean South	South America	Brazil	Rio de Janeiro	DIJ	1999
Atlantic Ocean South	South America	Brazil	Pernambuco	Recife	1999
Pacific Ocean South	Pacific Ocean Islands	New Zealand	South Island	Southland	1999
Pacific Ocean South	Pacific Ocean Islands	New Zealand	South Island	Southland	1999
Pacific Ocean South	Pacific Ocean Islands	New Zealand	South Island	Southland	1999
Indian Ocean	Africa	Mascarene Islands	Reunion Island	Saint-Pierre	1999
Indian Ocean	Africa	Tanzania	DIJ	DIJ	1999
Atlantic Ocean North	North America	USA	Florida	Brevard County	1999
Pacific Ocean	Pacific Ocean Islands	USA	Hawaii	Oahu	1999
Pacific Ocean	Australia	Australia	New South Wales	DIJ	1999
Atlantic Ocean North	North America	USA	Florida	Palm Beach County	1998
Atlantic Ocean North	North America	USA	Florida	Martin County	1998
Atlantic Ocean North	North America	USA	Florida	Martin County	1998
Atlantic Ocean South	South America	Brazil	Pernambuco	Recife	1998
Pacific Ocean North	North America	USA	Oregon	Lincoln County	1998
Indian Ocean	Africa	Mozambique	Maputo		1998
Indian Ocean	Africa	Republic of South Africa	Eastern Cape	Plettenberg Bay	1998
Atlantic Ocean North	North America	USA	Florida	Volusia County	1998
Atlantic Ocean North	North America	USA	Florida	Martin County	1998
Atlantic Ocean Area; harbor or bay	Africa	Republic of South Africa	Western Cape	Jacobsbaai	1998
Atlantic Ocean North	North America	USA	Florida	Volusia County	1998
Gulf of Mexico	North America	USA	Florida	Lee County	1998
Indian Ocean	Africa	Republic of South Africa	Eastern Cape	Jeffreys Bay	1998
Indian Ocean	Africa	Republic of South Africa	Eastern Cape	East London	1998
Caribbean Sea	Caribbean Islands	St. Maarten	DIJ	Anse Marcel	1998
Indian Ocean	Africa	Republic of South Africa	Eastern Cape	Plettenberg Bay	1998
Indian Ocean	Africa	Republic of South Africa	Eastern Cape	Plettenberg Bay	1998
Indian Ocean	Africa	Republic of South Africa	Eastern Cape	Jeffreys Bay	1998
Indian Ocean	Africa	Republic of South Africa	Eastern Cape	Port Elizabeth	1998
Pacific Ocean South	Australia	Australia	South Australia	Neptune Islands	1998
Indian Ocean	Africa	Republic of South Africa	Eastern Cape	St. Francis Bay	1998
Indian Ocean	Africa	Republic of South Africa	Eastern Cape	Port Elizabeth	1998
Gulf of Mexico	North America	USA	Louisiana	Plaquemines Parish	1998
Atlantic Ocean North	North America	USA	Florida	Volusia County	1998
Indian Ocean	Africa	Republic of South Africa	Western Cape	Knysna	1998
Indian Ocean	Africa	Republic of South Africa	Eastern Cape	East London	1998
Atlantic Ocean North	North America	USA	Florida	Volusia County	1998
Pacific Ocean North	North America	USA	California	Marin County	1998
Atlantic Ocean North	North America	USA	Florida	Volusia County	1998
Gulf of Mexico	North America	USA	Florida	Collier County	1998
Atlantic Ocean South	South America	Brazil	Pernambuco	Recife	1998
Atlantic Ocean North	North America	USA	Florida	Volusia County	1998
Atlantic Ocean North	North America	USA	Florida	Volusia County	1998
Atlantic Ocean North	North America	USA	Florida	Volusia County	1998
Atlantic Ocean North	North America	USA	Florida	Volusia County	1998
Atlantic Ocean North	North America	USA	Florida	Indian River County	1998
Atlantic Ocean North	North America	USA	Florida	Indian River County	1998
Atlantic Ocean North	North America	USA	Florida	Brevard County	1998
Atlantic Ocean North	North America	USA	Florida	Volusia County	1998
Atlantic Ocean North	North America	USA	Florida	Volusia County	1998
Indian Ocean Area; creek or river	Africa	Republic of South Africa	Eastern Cape	Port Alfred	1998
Indian Ocean	Africa	Republic of South Africa	Eastern Cape	Port Elizabeth	1998
Indian Ocean	Africa	Republic of South Africa	Eastern Cape	Kei Mouth	1998
Indian Ocean	Africa	Republic of South Africa	Eastern Cape	No Specifics	1998
Atlantic Ocean South	South America	Brazil	Pernambuco	Recife	1998
Atlantic Ocean South	South America	Brazil	Pernambuco	Recife	1998
Pacific Ocean Islands	Pacific Ocean Islands	USA	Hawaii	Maui	1998
Atlantic Ocean South	Africa	Republic of South Africa	Eastern Cape	Kenton Beach	1998
Indian Ocean	Australia	Australia	South Australia	Adelaide	1998
Atlantic Ocean North	North America	USA	Florida	Duval County	1998
Pacific Ocean North	North America	USA	California	San Diego County	1998
Pacific Ocean South	Australia	Australia	South Australia	DIJ	1998
Pacific Ocean	Australia	Australia	Queensland	DIJ	1998
Pacific Ocean South	Australia	Australia	Queensland	Whitsunday Island	1997
Pacific Ocean Islands	Australia	Australia	Queensland	Hook Island	1997
Atlantic Ocean North	North America	USA	Florida	Volusia County	1997
Atlantic Ocean North	North America	USA	Florida	Palm Beach County	1997
Pacific Ocean Area; creek or river	Australia	Australia	Queensland	Gold Coast	1997
Atlantic Ocean South	South America	Brazil	Rio de Janeiro	Buzios	1997
Atlantic Ocean North	North America	USA	Florida	Volusia County	1997
Atlantic Ocean North	North America	USA	Florida	Flagler County	1997
Atlantic Ocean North	North America	USA	Florida	Flagler County	1997
Atlantic Ocean North	North America	USA	Florida	Volusia County	1997
Atlantic Ocean South	South America	Brazil	Pernambuco	Recife	1997
Pacific Ocean Islands	Pacific Ocean Islands	Fiji Islands	Korulevu	DIJ	1997
Atlantic Ocean North	North America	USA	Florida	St. Johns County	1997
Atlantic Ocean North	North America	USA	Florida	Palm Beach County	1997
Atlantic Ocean North	North America	USA	Florida	Martin County	1997
Atlantic Ocean North	North America	USA	New York	Suffolk County	1997
Atlantic Ocean North	North America	USA	South Carolina	Horry County	1997
Pacific Ocean Islands	Pacific Ocean Islands	Vanuatu	Malakula	DIJ	1997
Indian Ocean	Africa	Republic of South Africa	Eastern Cape	Ntlonyana	1997
Atlantic Ocean South	South America	Brazil	Pernambuco	Cabo de Santo Agostinho	1997
Gulf of Mexico	North America	USA	Texas	Matagorda County	1997
Atlantic Ocean North	North America	USA	Florida	Volusia County	1997
Atlantic Ocean North	North America	USA	Florida	Volusia County	1997
Gulf of Mexico	North America	USA	Texas	Galveston County	1997
Atlantic Ocean North	North America	USA	Florida	Volusia County	1997
Caribbean Sea Islands	North America	Mexico	Quintana Roo Territory	Isla Cozumel	1997
Pacific Ocean North	North America	USA	California	Humboldt County	1997
Atlantic Ocean North	North America	USA	Florida	Volusia County	1997
Atlantic Ocean North	North America	USA	Florida	Volusia County	1997
Atlantic Ocean North	North America	USA	Florida	Volusia County	1997
Atlantic Ocean North	North America	USA	Florida	Volusia County	1997
Atlantic Ocean North	North America	USA	Florida	Volusia County	1997
Atlantic Ocean North	North America	USA	Florida	Volusia County	1997
Pacific Ocean Islands	Pacific Ocean Islands	Papua New Guinea	Papua	Madang	1997
Pacific Ocean Islands	Pacific Ocean Islands	Papua New Guinea	Papua	Madang	1997
Atlantic Ocean South	South America	Brazil	Pernambuco	Recife	1997
Atlantic Ocean North	North America	USA	Florida	Volusia County	1997
Pacific Ocean Islands	Asia	Japan	Kagoshima Prefecture	Tokunoshima	1997
Atlantic Ocean North	North America	USA	Florida	Volusia County	1997
Atlantic Ocean North	North America	USA	Florida	St. Lucie County	1997
Atlantic Ocean North	North America	USA	Florida	St. Lucie County	1997
Pacific Ocean Islands	Pacific Ocean Islands	USA	Hawaii	Kauai	1997
Red Sea and Gulf of Aden	Africa	Djibouti	DIJ	Gulf of Tadjoura	1997
Atlantic Ocean North	North America	USA	Florida	DIJ	1997
Indian Ocean	Australia	Australia	Western Australia	Albany	1997
Atlantic Ocean North	North America	USA	Florida	Broward County	1997
Atlantic Ocean North	North America	USA	Florida	Broward County	1997
Indian Ocean	Africa	Republic of South Africa	Eastern Cape	St. Francis Bay	1997
Atlantic Ocean South	South America	Brazil	Pernambuco	Recife	1997
Pacific Ocean South	Australia	Australia	Queensland	DIJ	1997
Pacific Ocean South	Australia	Australia	Queensland	DIJ	1997
Indian Ocean	Africa	Mascarene Islands	Reunion Island	Saint-Pierre	1997
Indian Ocean	Africa	Republic of South Africa	Western Cape	Wilderness	1996
Atlantic Ocean North	Europe	United kingdom	England		1996
Pacific Ocean	Pacific Ocean Islands	USA	Hawaii	Maui	1996
Indian Ocean	Africa	Mascarene Islands	Reunion Island	Saint-Paul	1996
Atlantic Ocean North	North America	USA	Florida	Volusia County	1996
Atlantic Ocean North	North America	USA	Florida	Duval County	1996
Gulf of Mexico Islands	North America	USA	Florida	Sarasota County	1996
Atlantic Ocean North	North America	USA	Florida	Volusia County	1996
Atlantic Ocean North	North America	USA	Massachusetts	Barnstable County	1996
Caribbean Sea	Caribbean Islands	Bahama Islands	Grand Bahama Island	DIJ	1996
Pacific Ocean Area; creek or river	Australia	Australia	New South Wales	Parramatta River	1996
Pacific Ocean Islands	Australia	Australia	Queensland	DIJ	1996
Red Sea and Gulf of Aden	Africa	Egypt	Sinai Peninsula	Gulf of Aqaba	1996
Atlantic Ocean North	North America	USA	Florida	Volusia County	1996
Atlantic Ocean North	North America	USA	Florida	Volusia County	1996
Pacific Ocean Islands	Pacific Ocean Islands	USA	Hawaii	Maui	1996
Atlantic Ocean North	North America	USA	Florida	Volusia County	1996
Gulf of Mexico	North America	USA	Florida	Collier County	1996
Pacific Ocean Islands	Pacific Ocean Islands	Papua New Guinea	Papua	Madang	1996
East China Sea	Asia	Japan	Okinawa Prefecture	Sakishima Shoto	1996
Atlantic Ocean North	North America	USA	North Carolina	DIJ	1996
Pacific Ocean Islands	Pacific Ocean Islands	New Zealand	Chatham Islands	Pitt Island	1996
Atlantic Ocean North	North America	USA	Florida	Volusia County	1996
Atlantic Ocean North	North America	USA	Florida	St. Johns County	1996
Atlantic Ocean North	North America	USA	Florida	Brevard County	1996
Pacific Ocean North	North America	USA	California	Marin County	1996
Pacific Ocean North	North America	USA	California	Sonoma County	1996
Atlantic Ocean North	North America	USA	Florida	St. Johns County	1996
Atlantic Ocean South	South America	Brazil	Pernambuco	Jaboatao dos Guararapes	1996
Atlantic Ocean South	South America	Brazil	Pernambuco	Jaboatao dos Guararapes	1996
Pacific Ocean Islands	Pacific Ocean Islands	New Zealand	North Island	Hawkes Bay	1996
Pacific Ocean South	Pacific Ocean Islands	Papua New Guinea	Papua	Madang	1996
Atlantic Ocean North	North America	USA	Florida	Palm Beach County	1996
Indian Ocean Area; harbor or bay	Africa	Republic of South Africa	Eastern Cape	Jeffreys Bay	1996
Indian Ocean	Australia	Australia	Victoria	DIJ	1996
Bass Strait	Australia	Australia	Victoria		1996
Pacific Ocean Islands	Pacific Ocean Islands	New Zealand	North Island	Gisborne District	1996
Pacific Ocean Islands	Pacific Ocean Islands	New Zealand	South Island	Marlborough District	1996
Pacific Ocean Islands	Pacific Ocean Islands	New Zealand	South Island	Marlborough District	1996
Caribbean Sea	Caribbean Islands	Bahama Islands	Abaco Islands	Pensacola Cays	1996
Indian Ocean	Africa	Republic of South Africa	KwaZulu-Natal	Kwazulu-Natal	1996
Indian Ocean	Africa	Republic of South Africa	Eastern Cape	Port Elizabeth	1996
Pacific Ocean North	North America	USA	California	Sonoma County	1996
Pacific Ocean Area; creek or river	Australia	Australia	Queensland	DIJ	1996
Pacific Ocean	Pacific Ocean Islands	USA	Hawaii	Maui	1996
Atlantic Ocean	North America	USA	Florida	Palm Beach County	1996
Red Sea and Gulf of Aden	Africa	Sudan	DIJ	DIJ	1995
Pacific Ocean Islands	Australia	Australia	Queensland	Rockhampton	1995
Indian Ocean	Asia	Pakistan	DIJ	DIJ	1995
Atlantic Ocean North	North America	USA	Florida	Volusia County	1995
Pacific Ocean South	Pacific Ocean Islands	Fiji Islands	Yasawa Group	Waya	1995
South China Sea	Asia	Hong Kong		Sai Kung	1995
South China Sea	Asia	Hong Kong		Sai Kung	1995
Atlantic Ocean North	North America	USA	Florida	Martin County	1995
Atlantic Ocean North	North America	USA	Florida	Martin County	1995
Atlantic Ocean North	North America	USA	Georgia	Chatham County	1995
Atlantic Ocean South	South America	Brazil	Pernambuco	Jaboatao dos Guararapes	1995
Pacific Ocean	Pacific Ocean Islands	USA	Hawaii	Maui	1995
Pacific Ocean North	North America	USA	California	Monterey County	1995
Atlantic Ocean North	North America	USA	Florida	Volusia County	1995
Gulf of Mexico	North America	USA	Texas	Nueces County	1995
Atlantic Ocean North	North America	USA	Florida	Volusia County	1995
Atlantic Ocean North	North America	USA	Florida	Volusia County	1995
Atlantic Ocean North	North America	USA	Florida	Volusia County	1995
Atlantic Ocean North	North America	USA	Florida	Volusia County	1995
Atlantic Ocean North	North America	USA	Florida	Volusia County	1995
Atlantic Ocean North	North America	USA	Florida	Volusia County	1995
Atlantic Ocean North	North America	USA	Florida	Volusia County	1995
Atlantic Ocean North	North America	USA	Florida	Volusia County	1995
Atlantic Ocean North	North America	USA	Florida	Volusia County	1995
Atlantic Ocean South	South America	Brazil	Pernambuco	Jaboatao dos Guararapes	1995
Atlantic Ocean South	South America	Brazil	Maranhao	Sao Luis	1995
Atlantic Ocean South	South America	Brazil	Pernambuco	Jaboatao dos Guararapes	1995
Atlantic Ocean South	South America	Brazil	Pernambuco	Recife	1995
Atlantic Ocean North	North America	USA	Florida	St. Johns County	1995
Atlantic Ocean North	North America	USA	Florida	Volusia County	1995
Atlantic Ocean North	North America	USA	Florida	Volusia County	1995
Atlantic Ocean North	North America	USA	Florida	St. Johns County	1995
Atlantic Ocean North	North America	USA	Florida	Volusia County	1995
Atlantic Ocean North	North America	USA	Florida	Brevard County	1995
Atlantic Ocean North	North America	USA	Florida	Brevard County	1995
Atlantic Ocean North	North America	USA	Florida	Indian River County	1995
Atlantic Ocean North	North America	USA	Florida	Volusia County	1995
Atlantic Ocean North	North America	USA	Florida	St. Johns County	1995
Atlantic Ocean North	North America	USA	Florida	Brevard County	1995
Atlantic Ocean North	North America	USA	Florida	Brevard County	1995
Atlantic Ocean North	North America	USA	Florida	Volusia County	1995
Atlantic Ocean North	North America	USA	North Carolina	New Hanover County	1995
Atlantic Ocean North	North America	USA	North Carolina	New Hanover County	1995
Atlantic Ocean North	North America	USA	North Carolina	Brunswick County	1995
Atlantic Ocean North	North America	USA	South Carolina	Horry County	1995
Atlantic Ocean North	North America	USA	South Carolina	Georgetown County	1995
Atlantic Ocean North	North America	USA	South Carolina	Georgetown County	1995
Atlantic Ocean North	North America	USA	South Carolina	Horry County	1995
Atlantic Ocean North	North America	USA	South Carolina	Horry County	1995
Atlantic Ocean North	North America	USA	Florida	Brevard County	1995
Atlantic Ocean North	North America	USA	Florida	Brevard County	1995
Pacific Ocean North	North America	USA	California	Santa Cruz County	1995
Pacific Ocean Area; harbor or bay	Australia	Australia	Queensland	Hervey Bay	1995
Indian Ocean	Australia	Australia	Western Australia	Hopetoun	1995
Pacific Ocean South	Pacific Ocean Islands	New Zealand	Chatham Islands	Star Keys	1995
Indian Ocean	Africa	Mascarene Islands	Reunion Island	Saint-Denis	1995
South China Sea	Asia	Hong Kong		Clear Water Bay	1995
Indian Ocean	Africa	Republic of South Africa	Eastern Cape	Eastern Cape	1995
Indian Ocean	Africa	Republic of South Africa	KwaZulu-Natal	Isipingo	1995
Indian Ocean	Africa	Republic of South Africa	Eastern Cape	East London	1995
Indian Ocean	Australia	Australia	South Australia	Whyalla	1995
Indian Ocean	Africa	Mascarene Islands	Reunion Island	Saint-Denis	1995
Atlantic Ocean North	Open Ocean		Open Ocean/Sea	DIJ	1995
Atlantic Ocean North	North America	USA	Florida	Indian River County	1995
Red Sea and Gulf of Aden	Africa	Egypt	Eastern Dessert	Quseir	1995
Indian Ocean	Africa	Republic of South Africa	Eastern Cape	East London	1995
Indian Ocean Islands	Australia	Australia	Western Australia	DIJ	1995
Bass Strait	Australia	Australia	Victoria	DIJ	1995
Pacific Ocean	Open Ocean	DIJ	Open Ocean/Sea	DIJ	1995
Atlantic Ocean North	North America	USA	Florida	Flagler County	1994
Atlantic Ocean North	North America	USA	Florida	Martin County	1994
Pacific Ocean Islands	Pacific Ocean Islands	New Caledonia			1994
Pacific Ocean South	Open Ocean		Open Ocean/Sea		1994
Atlantic Ocean North	North America	USA	Florida	Volusia County	1994
Atlantic Ocean North	North America	USA	Florida	Volusia County	1994
Atlantic Ocean North	North America	USA	Florida	Brevard County	1994
Atlantic Ocean North	North America	USA	Florida	Brevard County	1994
Atlantic Ocean North	North America	USA	Florida	Duval County	1994
Atlantic Ocean North	North America	USA	Florida	Volusia County	1994
Atlantic Ocean North	North America	USA	Florida	Volusia County	1994
Atlantic Ocean South	South America	Brazil	Sao Paulo	Santos	1994
Pacific Ocean	Pacific Ocean Islands	USA	Hawaii	Kauai	1994
Pacific Ocean	Pacific Ocean Islands	USA	Hawaii	Kauai	1994
Pacific Ocean South	Open Ocean		Open Ocean/Sea		1994
Atlantic Ocean North	North America	USA	Florida	Volusia County	1994
Atlantic Ocean North	North America	USA	Florida	Volusia County	1994
Atlantic Ocean North	North America	USA	Florida	Volusia County	1994
Indian Ocean	Africa	Republic of South Africa	Eastern Cape	East London	1994
Indian Ocean	Africa	Republic of South Africa	Eastern Cape	East London	1994
Atlantic Ocean North	North America	USA	Florida	Volusia County	1994
Indian Ocean	Africa	Republic of South Africa	Eastern Cape	East London	1994
Indian Ocean	Africa	Republic of South Africa	Eastern Cape	East London	1994
Pacific Ocean North	North America	USA	Oregon	Tillamook County	1994
Atlantic Ocean North	North America	USA	South Carolina	Beaufort County	1994
Atlantic Ocean North	North America	USA	Florida	Volusia County	1994
Atlantic Ocean North	North America	USA	Florida	Volusia County	1994
Pacific Ocean Islands	Pacific Ocean Islands	USA	Hawaii	Oahu	1994
Atlantic Ocean North	North America	USA	Florida	Volusia County	1994
Atlantic Ocean North	North America	USA	Florida	Volusia County	1994
Atlantic Ocean North	North America	USA	Florida	Brevard County	1994
Atlantic Ocean North	North America	USA	Florida	Indian River County	1994
Atlantic Ocean North	North America	USA	Florida	Brevard County	1994
Atlantic Ocean North	North America	USA	Florida	Brevard County	1994
Atlantic Ocean North	North America	USA	Florida	Brevard County	1994
Indian Ocean	Africa	Mascarene Islands	Reunion Island	Saint-Denis	1994
Atlantic Ocean North	North America	USA	Florida	Brevard County	1994
Pacific Ocean Islands	Pacific Ocean Islands	Fiji Islands	Tavenui		1994
East China Sea	Asia	Japan	Kagoshima Prefecture	Amami O Shima	1994
Atlantic Ocean South	South America	Brazil	Pernambuco	Jaboatao dos Guararapes	1994
Atlantic Ocean South	South America	Brazil	Pernambuco	Recife	1994
Atlantic Ocean South	South America	Brazil	Pernambuco	Recife	1994
Atlantic Ocean South	South America	Brazil	Pernambuco	Recife	1994
Atlantic Ocean South	South America	Brazil	Pernambuco	Cabo de Santo Agostinho	1994
Atlantic Ocean South	South America	Brazil	Pernambuco	Cabo de Santo Agostinho	1994
Atlantic Ocean South	South America	Brazil	Pernambuco	Recife	1994
Atlantic Ocean South	South America	Brazil	Sao Paulo	Itanhaem	1994
Pacific Ocean	Pacific Ocean Islands	USA	Hawaii	Kauai	1994
Atlantic Ocean South	South America	Brazil	Maranhao	Sao Luis	1994
Atlantic Ocean South	South America	Brazil	Pernambuco	Recife	1994
Atlantic Ocean South	South America	Brazil	Pernambuco	Recife	1994
Atlantic Ocean South	South America	Brazil	Pernambuco	Jaboatao dos Guararapes	1994
Atlantic Ocean South	South America	Brazil	Maranhao	Sao Luis	1994
Indian Ocean	Africa	Republic of South Africa	Eastern Cape	Hamburg	1994
Indian Ocean	Africa	Republic of South Africa	Eastern Cape	Algoa Bay	1994
Indian Ocean	Africa	Republic of South Africa	Western Cape	Mossel Bay	1994
Atlantic Ocean North	Caribbean Islands	Bahama Islands	Rum Cay Island	DIJ	1994
Pacific Ocean South	Australia	Australia	Queensland	DIJ	1994
Pacific Ocean South	Australia	Australia	Queensland	DIJ	1994
Pacific Ocean Area; creek or river	Australia	Australia	Queensland	DIJ	1994
Pacific Ocean North	Central America	El Salvador			1993
Pacific Ocean North	Central America	El Salvador			1993
Pacific Ocean Area; harbor or bay	North America	USA	Oregon	Coos County	1993
South China Sea	Asia	Hong Kong			1993
South China Sea	Asia	Hong Kong			1993
Pacific Ocean South	Australia	Australia	New South Wales	Byron Bay	1993
Pacific Ocean South	Australia	Australia	Tasmania	Tenth Island	1993
Pacific Ocean	Pacific Ocean Islands	USA	Hawaii	Maui	1993
Atlantic Ocean North	North America	USA	Florida	Palm Beach County	1993
Pacific Ocean North	Pacific Ocean Islands	USA	Hawaii	Oahu	1993
Pacific Ocean Islands	Pacific Ocean Islands	New Zealand	Chatham Islands	Chatham Island	1993
Caribbean Sea Islands	North America	Mexico	Quintana Roo Territory	Isla Cozumel	1993
Atlantic Ocean North	North America	USA	Florida	Duval County	1993
Atlantic Ocean North	North America	USA	Florida	Duval County	1993
Atlantic Ocean North	North America	USA	Florida	Flagler County	1993
Atlantic Ocean North	North America	USA	Florida	Indian River County	1993
Atlantic Ocean North	North America	USA	Florida	Volusia County	1993
Atlantic Ocean North	North America	USA	Florida	Volusia County	1993
Gulf of Mexico	North America	USA	Florida	Florida Keys	1993
Atlantic Ocean North	North America	USA	North Carolina	DIJ	1993
Pacific Ocean	Pacific Ocean Islands	USA	Hawaii	Kauai	1993
Indian Ocean	Africa	Somalia		Mogadishu	1993
Indian Ocean	Africa	Somalia		Mogadishu	1993
Indian Ocean	Africa	Somalia		Mogadishu	1993
South China Sea	Asia	Malaysia		Pekan	1993
Pacific Ocean	Pacific Ocean Islands	USA	Hawaii	Maui	1993
Pacific Ocean North	North America	USA	California	Humboldt County	1993
Atlantic Ocean North	North America	USA	Florida	St. Lucie County	1993
Mediterranean Sea	Europe	Spain	Valencia	Costa Blanca	1993
Atlantic Ocean North	North America	USA	Florida	Volusia County	1993
Pacific Ocean North	North America	USA	California	Santa Barbara County	1993
Atlantic Ocean South	South America	Brazil	Pernambuco	Recife	1993
Indian Ocean	Australia	Australia	Western Australia	Roebuck Bay	1993
Atlantic Ocean South	South America	Brazil	Pernambuco	Jaboatao dos Guararapes	1993
Atlantic Ocean South	South America	Brazil	Pernambuco	Jaboatao dos Guararapes	1993
Atlantic Ocean South	South America	Brazil	Sao Paulo	Praia Grande	1993
Indian Ocean	Africa	Republic of South Africa	KwaZulu-Natal	Hibberdene	1993
Indian Ocean	Africa	Republic of South Africa	Eastern Cape	East London	1993
Unknown	Africa	Republic of South Africa	Eastern Cape	Algoa Bay	1993
Caribbean Sea	Caribbean Islands	Cayman Islands	Little Cayman	Mary's Bay	1993
Pacific Ocean South	Australia	Australia	Queensland	DIJ	1993
Pacific Ocean	Pacific Ocean Islands	USA	Hawaii	Oahu	1993
Pacific Ocean	Australia	Australia	Queensland	DIJ	1993
Indian Ocean	Africa	Mascarene Islands	Reunion Island	Saint-Pierre	1992
Indian Ocean	Africa	Mascarene Islands	Reunion Island	Saint-Paul	1992
Atlantic Ocean Area; creek or river	South America	Argentina	Buenos Aires	Carabelas River	1992
Atlantic Ocean Area; creek or river	South America	Argentina	Buenos Aires	Carabelas River	1992
Pacific Ocean South	Australia	Australia	Queensland	Gold Coast	1992
Pacific Ocean Area; harbor or bay	North America	USA	Oregon	Douglas County	1992
Pacific Ocean Islands	Pacific Ocean Islands	USA	Hawaii	Oahu	1992
Pacific Ocean Islands	Pacific Ocean Islands	USA	Hawaii	Kauai	1992
Pacific Ocean Islands	Pacific Ocean Islands	New Zealand	Campbell Island	Campbell Island	1992
Atlantic Ocean Area; creek or river	South America	Argentina	Buenos Aires	Carabelas River	1992
Caribbean Sea	Caribbean Islands	Virgin Islands	St. John		1992
Gulf of Mexico	North America	USA	Florida	Sarasota County	1992
Atlantic Ocean South	South America	Brazil	Maranhao	Sao Luis	1992
Caribbean Sea	Caribbean Islands	Bahama Islands	Andros Islands	Rat Cay	1992
Atlantic Ocean North	North America	USA	Florida	Volusia County	1992
Atlantic Ocean North	North America	USA	Florida	Indian River County	1992
Atlantic Ocean North	North America	USA	Florida	St. Lucie County	1992
Pacific Ocean North	North America	USA	Oregon	Curry County	1992
Pacific Ocean Islands	Australia	Australia	Queensland	Moreton Island	1992
Pacific Ocean Area; harbor or bay	Australia	Australia	Victoria	Melbourne	1992
Indian Ocean	Africa	Republic of South Africa	Eastern Cape	East London	1992
Pacific Ocean Islands	Pacific Ocean Islands	Solomon Islands	New Hebrides	Malekula Island	1992
Atlantic Ocean South	South America	Brazil	Maranhao	Sao Luis	1992
Atlantic Ocean North	North America	USA	Florida	St. Lucie County	1992
Atlantic Ocean North	North America	USA	Florida	Brevard County	1992
Atlantic Ocean North	North America	USA	Florida	Brevard County	1992
Atlantic Ocean North	North America	USA	Florida	Volusia County	1992
Atlantic Ocean North	North America	USA	Florida	St. Lucie County	1992
Atlantic Ocean North	North America	USA	Florida	St. Lucie County	1992
Atlantic Ocean North	North America	USA	Florida	Palm Beach County	1992
Pacific Ocean	Pacific Ocean Islands	USA	Hawaii	Oahu	1992
Pacific Ocean	Pacific Ocean Islands	USA	Hawaii	Oahu	1992
Pacific Ocean North	Pacific Ocean Islands	USA	Hawaii	Oahu	1992
Pacific Ocean Islands	Pacific Ocean Islands	Fiji Islands	Tavenui		1992
Pacific Ocean South	Pacific Ocean Islands	New Zealand	South Island	Canterbury	1992
Gulf of Mexico	North America	USA	Texas	Galveston County	1992
Pacific Ocean North	North America	USA	California	Santa Barbara County	1992
Atlantic Ocean South	South America	Brazil	Pernambuco	Recife	1992
Atlantic Ocean South	South America	Brazil	Maranhao	Sao Luis	1992
Atlantic Ocean South	South America	Brazil	Maranhao	Sao Luis	1992
Atlantic Ocean South	South America	Brazil	Maranhao	Sao Luis	1992
Indian Ocean	Africa	Republic of South Africa	KwaZulu-Natal	Christmas Bay	1992
Indian Ocean	Africa	Republic of South Africa	KwaZulu-Natal	Isipingo Beach	1992
Pacific Ocean North	Pacific Ocean Islands	USA	Hawaii	Kauai	1992
Pacific Ocean South	Pacific Ocean Islands	New Zealand	North Island	Auckland	1992
Pacific Ocean South	Australia	Australia	Queensland	DIJ	1992
Pacific Ocean	Australia	Australia	Queensland	DIJ	1992
Gulf of Bothnia	Europe	Republic of Finland	DIJ	DIJ	1992
Indian Ocean	Africa	Mascarene Islands	Reunion Island	Saint-Pierre	1991
Pacific Ocean Islands	Pacific Ocean Islands	New Zealand	North Island	Auckland	1991
Pacific Ocean North	Pacific Ocean Islands	USA	Hawaii	Oahu	1991
Pacific Ocean North	Pacific Ocean Islands	USA	Hawaii	Oahu	1991
Pacific Ocean North	Pacific Ocean Islands	USA	Hawaii	Maui	1991
Pacific Ocean North	Pacific Ocean Islands	USA	Hawaii	Maui	1991
Pacific Ocean North	North America	USA	California	Santa Cruz County	1991
Pacific Ocean North	North America	USA	California	Santa Cruz County	1991
Gulf of Mexico	Open Ocean		Open Ocean/Sea		1991
Gulf of Mexico	North America	USA	Florida	Pinellas County	1991
Atlantic Ocean North	North America	USA	Florida	Brevard County	1991
Atlantic Ocean North	North America	USA	Florida	Duval County	1991
Atlantic Ocean North	North America	USA	Florida	Volusia County	1991
Atlantic Ocean North	North America	USA	Florida	Volusia County	1991
Atlantic Ocean North	North America	USA	Florida	Dade County	1991
Atlantic Ocean North	North America	USA	Florida	Indian River County	1991
Atlantic Ocean North	North America	USA	Florida	Brevard County	1991
Indian Ocean	Australia	Australia	South Australia	Adelaide	1991
Atlantic Ocean North	North America	USA	Florida	St. Lucie County	1991
Caribbean Sea	Caribbean Islands	Bahama Islands	Exuma		1991
Atlantic Ocean North	North America	USA	Florida	Brevard County	1991
Atlantic Ocean North	North America	USA	Florida	Indian River County	1991
Atlantic Ocean North	North America	USA	Florida	Brevard County	1991
Pacific Ocean North		USA	Oregon	Tillamook County	1991
Pacific Ocean South	Australia	Australia	Queensland	Surfer's Paradise	1991
South China Sea	Asia	Hong Kong		Kowloon	1991
Pacific Ocean North	North America	USA	Oregon		1991
Pacific Ocean North	North America	USA	California	Humboldt County	1991
Pacific Ocean South	Australia	Australia	New South Wales	Ballina	1991
Pacific Ocean South	Australia	Australia	Queensland	Gold Coast	1991
Pacific Ocean North	North America	USA	California	Marin County	1991
Atlantic Ocean North	North America	USA	South Carolina	Horry County	1991
Atlantic Ocean North	North America	USA	South Carolina	DIJ	1991
Pacific Ocean South	Australia	Australia	New South Wales	DIJ	1991
Pacific Ocean Area; harbor or bay	Australia	Australia	Queensland	DIJ	1991
Indian Ocean	Australia	Australia	Western Australia	DIJ	1991
Indian Ocean	Africa	Mascarene Islands	Reunion Island	Saint-Denis	1990
Atlantic Ocean North	North America	USA	Florida	Escambia County	1990
Atlantic Ocean North	North America	USA	Florida	Brevard County	1990
Atlantic Ocean North	North America	USA	Florida	Brevard County	1990
Atlantic Ocean North	North America	USA	Florida	Brevard County	1990
Atlantic Ocean North	North America	USA	Florida	Martin County	1990
Atlantic Ocean North	North America	USA	Florida	Volusia County	1990
Atlantic Ocean North	North America	USA	Florida	Martin County	1990
Pacific Ocean Islands	Pacific Ocean Islands	New Zealand	North Island	Hawkes Bay	1990
Atlantic Ocean North	North America	USA	Florida	Palm Beach County	1990
Pacific Ocean Islands	Pacific Ocean Islands	USA	Hawaii	Kauai	1990
Pacific Ocean North	Pacific Ocean Islands	USA	Hawaii	Oahu	1990
Indian Ocean	Africa	Kenya		Kalindi Harbour	1990
Atlantic Ocean North	North America	USA	Florida	Brevard County	1990
Atlantic Ocean North	North America	USA	Florida	St. Johns County	1990
Pacific Ocean North	North America	USA	California	Monterey County	1990
Pacific Ocean South	Australia	Australia	Queensland	Gold Coast	1990
Indian Ocean	Africa	Republic of South Africa	Eastern Cape	Algoa Bay	1990
Indian Ocean	Africa	Republic of South Africa	Eastern Cape	East London	1990
	Africa	Republic of South Africa	Western Cape	Mossel Bay	1990
Pacific Ocean North	North America	USA	California	Humboldt County	1990
Pacific Ocean Islands	Pacific Ocean Islands	Fiji Islands	Laucala Island		1990
Caribbean Sea	Caribbean Islands	Bahama Islands	Bimini		1990
Pacific Ocean Islands	Pacific Ocean Islands	Fiji Islands			1990
Gulf of Mexico Islands	North America	USA	Texas	Nueces County	1990
Gulf of Mexico Islands	North America	USA	Texas	Nueces County	1990
Gulf of Mexico	North America	USA	Texas	Nueces County	1990
Pacific Ocean North	North America	USA	California	San Mateo County	1990
Pacific Ocean North	North America	Mexico	Baja California Sur Territory		1990
Pacific Ocean South	Australia	Australia	Queensland	Fingal	1990
Pacific Ocean South	Pacific Ocean Islands	New Zealand	South Island	Otago	1990
Atlantic Ocean South	South America	Brazil	Rio Grande do Sul	Rio Grande	1990
Atlantic Ocean South	South America	Brazil	Rio Grande do Sul	Rio Grande	1990
Pacific Ocean Area; creek or river	Australia	Australia	Queensland	Brisbane	1990
Indian Ocean Area; bay or harbour	Africa	Kenya	DIJ	DIJ	1990
Atlantic Ocean	North America	USA	Florida	Volusia County	1990
Mediterranean Sea	Europe	Italy	Tuscany		1989
Atlantic Ocean North	North America	USA	Florida	Brevard County	1989
Atlantic Ocean North	North America	USA	Florida	St. Johns County	1989
Atlantic Ocean North	North America	USA	Florida	Palm Beach County	1989
Atlantic Ocean North	North America	USA	Florida	Indian River County	1989
Pacific Ocean South	Australia	Australia	New South Wales	Sydney	1989
Indian Ocean	Australia	Australia	South Australia	Adelaide	1989
Atlantic Ocean North	North America	USA	Florida	Lee County	1989
Atlantic Ocean North	North America	USA	Florida	Collier County	1989
Atlantic Ocean North	North America	USA	Florida	Brevard County	1989
Atlantic Ocean North	North America	USA	Florida	Brevard County	1989
Gulf of Mexico	North America	USA	Texas	Matagorda County	1989
Pacific Ocean Islands	North America	USA	California	San Francisco County	1989
Atlantic Ocean North	North America	USA	Florida	Pinellas County	1989
Pacific Ocean North	Pacific Ocean Islands	USA	Hawaii	Molokai	1989
Pacific Ocean North	Pacific Ocean Islands	USA	Hawaii	Maui	1989
Pacific Ocean North	Pacific Ocean Islands	USA	Hawaii	Kauai	1989
Pacific Ocean North	Pacific Ocean Islands	USA	Hawaii	Kauai	1989
Gulf of Mexico	North America	USA	Texas	Brazoria County	1989
Indian Ocean	Africa	Republic of South Africa	KwaZulu-Natal	Isipingo	1989
Indian Ocean	Africa	Republic of South Africa	KwaZulu-Natal	Richard's Bay	1989
Indian Ocean	Africa	Republic of South Africa	Eastern Cape	East London	1989
	Africa	Republic of South Africa	Eastern Cape	Jeffreys Bay	1989
	Africa	Republic of South Africa	Eastern Cape	Jeffreys Bay	1989
	Africa	Republic of South Africa	Western Cape	Mossel Bay	1989
Atlantic Ocean North	North America	USA	North Carolina	Dare County	1989
Pacific Ocean South	Australia	Australia	Tasmania		1989
Pacific Ocean South	Australia	Australia	Victoria	Kilcunda	1989
Pacific Ocean North	North America	USA	Washington	Grays Harbor County	1989
Pacific Ocean South	Australia	Australia	New South Wales	Ballina	1989
Indian Ocean	Africa	Mascarene Islands	Reunion Island	Saint-Denis	1989
Indian Ocean Area; creek or river	Australia	Australia	Northern Territory	DIJ	1989
Mediterranean Sea	Europe	Italy	Puglia	Manfredonia	1988
Atlantic Ocean North	North America	USA	South Carolina	Beaufort County	1988
Indian Ocean	Africa	Mascarene Islands	Reunion Island	Saint-Pierre	1988
Indian Ocean	Africa	Mascarene Islands	Reunion Island	Saint-Pierre	1988
Pacific Ocean North	North America	USA	Oregon	Clatsop County	1988
Atlantic Ocean North	North America	USA	Florida	Palm Beach County	1988
Gulf of Mexico	North America	USA	Florida	Bay County	1988
Pacific Ocean North	North America	USA	California	Del Norte County	1988
Gulf of Mexico	North America	USA	Florida	Bay County	1988
Atlantic Ocean North	North America	USA	Florida	Brevard County	1988
Atlantic Ocean North	North America	USA	Florida	Brevard County	1988
Atlantic Ocean North	North America	USA	Florida	Palm Beach County	1988
Atlantic Ocean North	North America	USA	Florida	Palm Beach County	1988
Atlantic Ocean North	North America	USA	Florida	Palm Beach County	1988
Atlantic Ocean North	North America	USA	Florida	Martin County	1988
Atlantic Ocean North	North America	USA	Florida	Volusia County	1988
Atlantic Ocean North	North America	USA	Florida	Brevard County	1988
Pacific Ocean South	Australia	Australia	South Australia		1988
Atlantic Ocean North	North America	USA	Florida	St. Lucie County	1988
Pacific Ocean South	Australia	Australia	Victoria		1988
Pacific Ocean North	Pacific Ocean Islands	USA	Hawaii	Kauai	1988
Atlantic Ocean North	North America	USA	Florida	Palm Beach County	1988
Indian Ocean	Africa	Republic of South Africa	KwaZulu-Natal	Mtunzini	1988
Indian Ocean	Africa	Republic of South Africa	KwaZulu-Natal	Isipingo	1988
Indian Ocean	Africa	Republic of South Africa	Eastern Cape	East London	1988
Pacific Ocean North	North America	USA	California	San Luis Obispo County	1988
Atlantic Ocean North	North America	USA	North Carolina	Hyde County	1988
Pacific Ocean Islands	Asia	Japan	Ogasawara Islands; Tokyo	Minami Daito Jima	1988
Atlantic Ocean South	South America	Brazil	Sao Paulo	Guaruja	1988
Atlantic Ocean North	North America	USA	DIJ	DIJ	1988
Atlantic Ocean North	North America	USA	Florida	Volusia County	1988
Gulf of Mexico	North America	USA	Florida	Bay County	1988
Atlantic Ocean North	North America	USA	Florida	Brevard County	1987
Atlantic Ocean North	North America	USA	Florida	St. Johns County	1987
Atlantic Ocean Islands	North America	USA	Texas	Nueces County	1987
Gulf of Mexico	North America	USA	Texas	Nueces County	1987
Gulf of Mexico	North America	USA	Texas	Nueces County	1987
Gulf of Mexico Islands	North America	USA	Texas	Galveston County	1987
Pacific Ocean North	North America	USA	California	San Mateo County	1987
Atlantic Ocean North	North America	USA	Florida	Palm Beach County	1987
Atlantic Ocean North	North America	USA	Florida	Palm Beach County	1987
Atlantic Ocean North	North America	USA	Florida	Palm Beach County	1987
Atlantic Ocean North	North America	USA	Florida	Martin County	1987
Atlantic Ocean North	North America	USA	South Carolina	Horry County	1987
	Africa	Republic of South Africa	Western Cape	Still Bay	1987
Indian Ocean	Australia	Australia	Western Australia	Geographe Bay	1987
Pacific Ocean South	Pacific Ocean Islands	New Zealand	North Island	Taranaki	1987
Indian Ocean	Africa	Kenya	DIJ	Mombasa	1987
Indian Ocean	Africa	Kenya	DIJ	Mombasa	1987
Indian Ocean	Australia	Australia	Western Australia	DIJ	1987
Indian Ocean Area; creek or river	Australia	Australia	Northern Territory	DIJ	1987
Mediterranean Sea	Europe	France		Golfe du Lyon	1986
Atlantic Ocean North	North America	USA	Florida	Martin County	1986
Atlantic Ocean North	North America	USA	Florida	Volusia County	1986
Indian Ocean	Africa	Republic of South Africa	KwaZulu-Natal	Durban	1986
Indian Ocean	Africa	Republic of South Africa	Eastern Cape	Port Elizabeth	1986
Indian Ocean	Africa	Republic of South Africa	Eastern Cape	East London	1986
Indian Ocean Area; creek or river	Africa	Republic of South Africa	Western Cape	Groot Brak River	1986
Atlantic Ocean South	South America	Brazil	Rio Grande do Sul		1986
Atlantic Ocean North	North America	USA	Florida	Brevard County	1986
Mediterranean Sea	Europe	Spain			1986
Atlantic Ocean North	North America	USA	North Carolina	New Hanover County	1986
Indian Ocean	Australia	Australia	Cocos (Keeling) Islands	Direction Island	1986
Pacific Ocean	Australia	Australia	New South Wales	DIJ	1986
Atlantic Ocean North	North America	USA	Florida	Volusia County	1985
Atlantic Ocean North	North America	USA	Florida	Brevard County	1985
Atlantic Ocean North	North America	USA	South Carolina	Charleston County	1985
Atlantic Ocean North	North America	USA	Florida	Volusia County	1985
Atlantic Ocean North	North America	USA	South Carolina	Beaufort County	1985
Pacific Ocean North	Pacific Ocean Islands	USA	Hawaii	Oahu	1985
Pacific Ocean North	Pacific Ocean Islands	USA	Hawaii	Kauai	1985
Indian Ocean	Asia	Sri Lanka			1985
Persian Gulf; creek or river	Asia	Iran	Khuzestan		1985
Indian Ocean	Africa	Republic of South Africa	KwaZulu-Natal	Umbogentwini	1985
Indian Ocean	Africa	Republic of South Africa	Eastern Cape	East London	1985
Atlantic Ocean North	North America	USA	North Carolina	New Hanover County	1985
Pacific Ocean North	North America	USA	California	Orange County	1985
Pacific Ocean North	North America	USA	California	Santa Barbara County	1985
Pacific Ocean North	North America	USA	California	Marin County	1985
Atlantic Ocean North	North America	USA	Delaware	DIJ	1985
Atlantic Ocean North	North America	USA	Delaware	DIJ	1985
Atlantic Ocean North	North America	USA	Florida	Brevard County	1985
Pacific Ocean South	Australia	Australia	Victoria	DIJ	1985
Atlantic Ocean North	North America	USA	Florida	Brevard County	1984
Atlantic Ocean North	North America	USA	Florida	Brevard County	1984
Atlantic Ocean North	North America	USA	Florida	Brevard County	1984
Atlantic Ocean North	North America	USA	Florida	Volusia County	1984
Pacific Ocean Area; harbor or bay	North America	USA	California	Marin County	1984
Atlantic Ocean North	North America	USA	Florida	St. Lucie County	1984
Atlantic Ocean North	North America	USA	Florida	Indian River County	1984
Pacific Ocean North	North America	USA	Oregon	Tillamook County	1984
Pacific Ocean North	Pacific Ocean Islands	USA	Hawaii	Oahu	1984
Atlantic Ocean North	North America	USA	Florida	Brevard County	1984
Atlantic Ocean South	Africa	Republic of South Africa	Western Cape	Muizenberg	1984
Pacific Ocean North	North America	USA	California	San Diego County	1984
Pacific Ocean South	Australia	Australia	New South Wales	Broken Head	1984
Pacific Ocean Islands	Pacific Ocean Islands	New Zealand	North Island	Auckland	1984
Atlantic Ocean South	South America	Brazil	Ceara		1984
Atlantic Ocean North	North America	USA	Florida	Brevard County	1984
Atlantic Ocean North	North America	USA	Florida	Brevard County	1984
Indian Ocean	Africa	Mascarene Islands	Reunion Island	Saint-Paul	1984
Red Sea and Gulf of Aden	Africa	Sudan	Eastern Sudan	Port Sudan	1984
Indian Ocean	Australia	Australia	Western Australia	DIJ	1984
Pacific Ocean South	Australia	Australia	Tasmania	Tasmania	1984
DIJ	Australia	Australia	Tasmania	DIJ	1984
Mediterranean Sea	Europe	Italy	Liguria	Riomaggiore	1983
Pacific Ocean Islands	Pacific Ocean Islands	New Zealand			1983
Pacific Ocean Islands	Pacific Ocean Islands	New Zealand	South Island	Canterbury	1983
Atlantic Ocean North	North America	USA	Florida	Palm Beach County	1983
Atlantic Ocean North	North America	USA	Florida	Brevard County	1983
Pacific Ocean North	North America	USA	Oregon	Tillamook County	1983
Gulf of Mexico	North America	USA	Florida	Florida Keys	1983
Atlantic Ocean North	North America	USA	Florida	Indian River County	1983
Atlantic Ocean North	North America	USA	Florida	St. Lucie County	1983
Atlantic Ocean North	North America	USA	Florida	Volusia County	1983
Pacific Ocean South	North America	USA			1983
Atlantic Ocean North	North America	USA	Florida	Brevard County	1983
Atlantic Ocean North	North America	USA	Florida	Dade County	1983
Atlantic Ocean North	North America	USA	Florida	Martin County	1983
Indian Ocean	Africa	Republic of South Africa	KwaZulu-Natal	Mtunzini	1983
Atlantic Ocean South	Africa	Republic of South Africa	Western Cape	Muizenberg	1983
Indian Ocean	Africa	Republic of South Africa	Eastern Cape	East London	1983
Indian Ocean	Africa	Republic of South Africa	Eastern Cape	East London	1983
Indian Ocean Area; creek or river	Africa	Republic of South Africa	Eastern Cape	Fish River	1983
Atlantic Ocean South	South America	Brazil	Sao Paulo	Santos	1983
Indian Ocean	Africa	Republic of South Africa	Eastern Cape	East London	1983
Pacific Ocean Area; harbor or bay	North America	USA	California	San Mateo County	1983
Indian Ocean Islands	Australia	Australia	Tasmania		1982
Pacific Ocean North	North America	USA	California	Sonoma County	1982
Atlantic Ocean North	North America	USA	Florida	Martin County	1982
Pacific Ocean South	Australia	Australia	New South Wales	Byron Bay	1982
Atlantic Ocean North	North America	USA	Florida	Palm Beach County	1982
Gulf of Mexico Islands	North America	USA	Florida	Collier County	1982
Indian Ocean	Africa	Republic of South Africa	KwaZulu-Natal	Durban	1982
Unknown	North America	USA	Florida	Volusia County	1982
Atlantic Ocean North	North America	USA	Florida	Volusia County	1982
Atlantic Ocean North	North America	USA	Florida	Brevard County	1982
Atlantic Ocean North	North America	USA	South Carolina	Charleston County	1982
Pacific Ocean North	Pacific Ocean Islands	USA	Hawaii	Oahu	1982
Pacific Ocean North	Pacific Ocean Islands	USA	Hawaii	Oahu	1982
Pacific Ocean North	Pacific Ocean Islands	USA	Hawaii	Maui	1982
Pacific Ocean North	North America	USA	California	San Luis Obispo County	1982
Pacific Ocean Area; harbor or bay	North America	USA	California	San Luis Obispo County	1982
Indian Ocean Area; creek or river	Africa	Republic of South Africa	Eastern Cape	Fish River	1982
Indian Ocean	Africa	Republic of South Africa	Eastern Cape	East London	1982
Indian Ocean	Africa	Republic of South Africa	Eastern Cape	East London	1982
East China Sea	Asia	Japan	Kumamoto Prefecture		1982
	Australia	Australia	Tasmania		1982
Atlantic Ocean South	Africa	Republic of South Africa	Western Cape	DIJ	1982
Indian Ocean	Africa	Republic of South Africa	Eastern Cape	No Specifics	1981
Atlantic Ocean North	North America	USA	Florida	Brevard County	1981
Atlantic Ocean North	North America	USA	Florida	Brevard County	1981
Pacific Ocean North	North America	USA	California	Monterey County	1981
Gulf of Mexico	North America	USA	Florida	Florida Keys	1981
Atlantic Ocean North	North America	USA	Florida	Palm Beach County	1981
Atlantic Ocean North	North America	USA	Florida	Palm Beach County	1981
Atlantic Ocean North	North America	USA	Florida	Palm Beach County	1981
Atlantic Ocean North	North America	USA	Florida	Palm Beach County	1981
Caribbean Sea	Caribbean Islands	Bahama Islands	Abaco Islands		1981
Atlantic Ocean North	North America	USA	Florida	Pinellas County	1981
Caribbean Sea	Caribbean Islands	Bahama Islands	Bimini	Little Isaac Bank	1981
Atlantic Ocean North	North America	USA	Florida	Volusia County	1981
Atlantic Ocean North	North America	USA	Florida	Brevard County	1981
Atlantic Ocean North	North America	USA	Florida	Brevard County	1981
Gulf of Mexico Islands	North America	USA	Florida	Pinellas County	1981
Atlantic Ocean North	North America	USA	Florida	Brevard County	1981
Atlantic Ocean North	North America	USA	Florida	Brevard County	1981
Atlantic Ocean North	North America	USA	Florida	Brevard County	1981
Atlantic Ocean North	North America	USA	Florida	Brevard County	1981
Atlantic Ocean North	North America	USA	Florida	Palm Beach County	1981
Atlantic Ocean North	North America	USA	Florida	Martin County	1981
Pacific Ocean North	Pacific Ocean Islands	USA	Hawaii	Oahu	1981
Indian Ocean	Africa	Republic of South Africa	KwaZulu-Natal	Umtentweni	1981
Indian Ocean	Africa	Republic of South Africa	Eastern Cape	Port Elizabeth	1981
Indian Ocean	Africa	Republic of South Africa	Eastern Cape	East London	1981
Indian Ocean	Africa	Republic of South Africa	Eastern Cape	East London	1981
Atlantic Ocean South	South America	Brazil	Rio de Janeiro	Cabo Frio	1981
Indian Ocean	Africa	Mascarene Islands	Reunion Island	Saint-Pierre	1981
Atlantic Ocean North	North America	USA	Florida	Volusia County	1981
	Africa	Republic of South Africa	KwaZulu-Natal	Ballito	1980
Gulf of Mexico	North America	USA	Florida	Florida Keys	1980
Atlantic Ocean North	North America	USA	Delaware		1980
Pacific Ocean North	Pacific Ocean Islands	USA	Hawaii	Maui	1980
Atlantic Ocean North	North America	USA	North Carolina	Brunswick County	1980
Pacific Ocean North	North America	USA	Oregon	Douglas County	1980
Pacific Ocean North	North America	USA	California	Humboldt County	1980
Indian Ocean	Africa	Republic of South Africa	Eastern Cape	Port Elizabeth	1980
Indian Ocean	Africa	Republic of South Africa	Eastern Cape	East London	1980
Indian Ocean	Africa	Republic of South Africa	Eastern Cape	East London	1980
Atlantic Ocean South	South America	Brazil	Sao Paulo	Sao Vicente	1980
Atlantic Ocean South	South America	Brazil	Rio de Janeiro	Rio de Janeiro	1980
Atlantic Ocean South	South America	Brazil	Pernambuco	Jaboatao dos Guararapes	1980
Pacific Ocean	Australia	Australia	Queensland	DIJ	1980
Mediterranean Sea	Europe	Greece	Dodecanese Islands	Kos Island	1980
South China Sea	Asia	Hong Kong			1979
Atlantic Ocean North	North America	USA	Florida	Palm Beach County	1979
Gulf of Mexico	North America	USA	Florida	Florida Keys	1979
Atlantic Ocean North	North America	USA	Florida	Volusia County	1979
Atlantic Ocean North	North America	USA	Florida	Brevard County	1979
Pacific Ocean North	North America	USA	Oregon	Clatsop County	1979
Pacific Ocean North	North America	USA	California	San Mateo County	1979
South China Sea	Asia	Hong Kong	Sai Kung	Hoi Ha Bay	1979
Atlantic Ocean North	North America	USA	Florida	Palm Beach County	1979
Indian Ocean	Africa	Republic of South Africa	Eastern Cape	Port Alfred	1979
Indian Ocean	Africa	Republic of South Africa	Eastern Cape	Kenton-on-Sea	1979
South China Sea	Asia	Singapore	DIJ	DIJ	1979
Mediterranean Sea	Europe	Italy	Latium	Anzio	1978
Atlantic Ocean North	North America	USA	Florida	Duval County	1978
Atlantic Ocean North	North America	USA	Florida	Duval County	1978
Atlantic Ocean North	North America	USA	Florida	Duval County	1978
Pacific Ocean North	Pacific Ocean Islands	USA	Hawaii	Oahu	1978
Atlantic Ocean North	North America	USA	Florida	Brevard County	1978
Pacific Ocean North	North America	USA	California	Santa Cruz County	1978
Atlantic Ocean North	North America	USA	Florida	Palm Beach County	1978
Indian Ocean	Africa	Republic of South Africa	KwaZulu-Natal	Other than Durban	1978
Pacific Ocean Islands	Pacific Ocean Islands	Marshall Islands	Enewetak Atoll		1978
Pacific Ocean Islands	Pacific Ocean Islands	Marshall Islands	Enewetak Atoll		1978
Pacific Ocean Islands	Australia	Australia	Queensland	Bribie Island	1978
Pacific Ocean North	Pacific Ocean Islands	Marshall Islands	Enewetak Atoll	DIJ	1978
Pacific Ocean South	Australia	Australia	Western Australia	DIJ	1978
Pacific Ocean Area; harbor or bay	North America	Mexico	Guerrero Territory	Acapulco	1977
Atlantic Ocean North	North America	USA	Florida	Martin County	1977
Atlantic Ocean North	North America	USA	Florida	Volusia County	1977
Caribbean Sea	North America	Mexico	Yucatan Territory	DIJ	1977
Pacific Ocean North	Pacific Ocean Islands	USA	Hawaii	Maui	1977
Atlantic Ocean North	North America	USA	Florida	Martin County	1977
Indian Ocean	Australia	Australia	South Australia	Ceduna	1977
Atlantic Ocean North	North America	USA	Florida	Brevard County	1977
Atlantic Ocean North	North America	USA	Florida	Brevard County	1977
Atlantic Ocean North	North America	USA	Florida	Volusia County	1977
Gulf of Mexico	North America	USA	Florida	Pinellas County	1977
	Africa	Republic of South Africa	Western Cape	Still Bay	1977
Indian Ocean	Africa	Republic of South Africa	Eastern Cape		1977
Persian Gulf	Asia	United Arab Emerits	DIJ	DIJ	1977
Mediterranean Sea	Africa	Tunisia			1976
Atlantic Ocean North	North America	USA	Florida	Volusia County	1976
Atlantic Ocean North	North America	USA	Florida	Duval County	1976
Pacific Ocean North	Pacific Ocean Islands	USA	Hawaii	Maui	1976
Atlantic Ocean North	North America	USA	Florida	Palm Beach County	1976
Atlantic Ocean South	Africa	Republic of South Africa	Western Cape	Cape Town	1976
Pacific Ocean North	North America	USA	California	Humboldt County	1976
Pacific Ocean North	North America	USA	Oregon		1976
Indian Ocean	Africa	Republic of South Africa	Eastern Cape	Cape St. Francis	1976
Atlantic Ocean South	South America	Brazil	Pernambuco	Jaboatao dos Guararapes	1976
Atlantic Ocean South	South America	Brazil	Pernambuco	Recife	1976
Atlantic Ocean North	North America	USA	North Carolina	Carteret County	1976
Gulf of Mexico	North America	USA	Florida	Pinellas County	1976
Atlantic Ocean North	North America	USA	Florida	Volusia County	1975
Atlantic Ocean North	North America	USA	Florida	Volusia County	1975
Gulf of Mexico	North America	USA	Alabama		1975
Atlantic Ocean North	North America	USA	Florida	Volusia County	1975
Pacific Ocean North	North America	USA	California	Santa Barbara County	1975
Atlantic Ocean North	North America	USA	Florida	Volusia County	1975
Atlantic Ocean North	North America	USA	New Jersey	Monmouth County	1975
Atlantic Ocean North	North America	USA	Florida	Brevard County	1975
Gulf of Mexico	North America	USA	Florida	Florida Keys	1975
Atlantic Ocean North	North America	USA	Florida	Dade County	1975
Atlantic Ocean North	North America	USA	Florida	St. Johns County	1975
Indian Ocean	Africa	Republic of South Africa	Eastern Cape	Cape St. Francis	1975
Indian Ocean	Africa	Republic of South Africa	KwaZulu-Natal	Amanzimtoti	1975
Atlantic Ocean South	South America	Brazil	Sao Paulo	Santos	1975
Atlantic Ocean North	North America	USA	Florida	St. Lucie County	1975
Pacific Ocean North	North America	USA	California	Santa Barbara County	1975
Pacific Ocean South	Australia	Australia	Victoria	DIJ	1975
Pacific Ocean	Australia	Australia	New South Wales	DIJ	1975
Atlantic Ocean	Africa	Republic of South Africa	KwaZulu-Natal	DIJ	1975
Mediterranean Sea	Europe	Croatia	Dalmatia	Omis	1974
Pacific Ocean North	North America	USA	California	San Mateo County	1974
Indian Ocean	Africa	Republic of South Africa	KwaZulu-Natal	Amanzimtoti	1974
Pacific Ocean North	North America	USA	California	Marin County	1974
Pacific Ocean North	North America	USA	California	Monterey County	1974
Atlantic Ocean North	North America	USA	Florida	Volusia County	1974
Atlantic Ocean North	North America	USA	Florida	Volusia County	1974
Atlantic Ocean North	North America	USA	Florida	Volusia County	1974
Pacific Ocean North	North America	USA	California	San Mateo County	1974
Pacific Ocean Area; creek or river	North America	USA	Oregon		1974
	Australia	Australia	South Australia	Ceduna	1974
South China Sea	Asia	Hong Kong	DIJ	DIJ	1974
Indian Ocean	Africa	Republic of South Africa	KwaZulu-Natal	Amanzimtoti	1974
Indian Ocean	Africa	Republic of South Africa	KwaZulu-Natal	Amanzimtoti	1974
Indian Ocean	Africa	Republic of South Africa	KwaZulu-Natal	Amanzimtoti	1974
Red Sea and Gulf of Aden	Asia	Israel			1974
South China Sea	Asia	Hong Kong	DIJ	DIJ	1974
South China Sea	Asia	Hong Kong	DIJ	DIJ	1974
South China Sea	Asia	Hong Kong	DIJ	DIJ	1974
South China Sea	Asia	Hong Kong	DIJ	DIJ	1974
Pacific Ocean North	North America	USA	California	San Mateo County	1974
Indian Ocean	Africa	Republic of South Africa	KwaZulu-Natal	Zululand	1974
Atlantic Ocean North	North America	USA	Virginia	Virginia Beach	1974
Atlantic Ocean North	North America	USA	New York	Suffolk County	1974
Pacific Ocean North	North America	Mexico	Guerrero Territory	Acapulco	1973
Pacific Ocean North	North America	Mexico	Guerrero Territory	Acapulco	1973
Pacific Ocean Area; harbor or bay	North America	Mexico	Guerrero Territory	Acapulco	1973
Pacific Ocean Islands	Pacific Ocean Islands	Federated States of Micronesia	Caroline Islands		1973
Pacific Ocean North	Pacific Ocean Islands	USA	Hawaii	Maui	1973
Pacific Ocean North	Pacific Ocean Islands	USA	Hawaii	Maui	1973
Pacific Ocean North	North America	Mexico	Baja California	Isla de Guadalupe	1973
Pacific Ocean	Australia	Australia	Queensland	Cooktown	1973
Pacific Ocean Area; harbor or bay	Pacific Ocean Islands	New Zealand	South Island	Otago	1973
Atlantic Ocean North	North America	USA	Virginia	Virginia Beach County	1973
Pacific Ocean	Australia	Australia	New South Wales	DIJ	1973
Mediterranean Sea	Europe	France	Alpes-Maritimes	Antibes	1972
Pacific Ocean Islands	Pacific Ocean Islands	American Samoa	Tutuila Island		1972
Pacific Ocean North	North America	Mexico	Guerrero Territory	Acapulco	1972
Pacific Ocean Islands	Pacific Ocean Islands	Marshall Islands	Enewetak Atoll		1972
Pacific Ocean North	North America	USA	California	Monterey County	1972
Pacific Ocean Islands	Pacific Ocean Islands	New Zealand	North Island	Wellington	1972
Atlantic Ocean North	North America	USA	Florida	St. Lucie County	1972
Atlantic Ocean North	Caribbean Islands	Virgin Islands	St.Croix		1972
Pacific Ocean North	North America	Mexico	Nayarit	DIJ	1972
Pacific Ocean	Pacific Ocean Islands	New Zealand	North Island	Wellington	1972
Mediterranean Sea	Europe	Croatia	Istria		1971
Caribbean Sea	South America	Venezuela			1971
Caribbean Sea	South America	Venezuela			1971
Indian Ocean	Australia	Australia	Tasmania	No Specifics	1971
[truncated: 258 more rows]
